# Supplementary material for: Effects and Prognostic Values of Circadian Genes CSNK1E/GNA11/KLF9/THRAP3 in Kidney Renal Clear Cell Carcinoma via a Comprehensive Analysis
Source: MDPI journal article supplement (doi:10.3390/bioengineering9070306), 2022-07-11
Supplement: s1 [file s1]

**Supplementary Table S2.**

| <b>GO analysis</b> |                                                                                                                           |          |
|--------------------|---------------------------------------------------------------------------------------------------------------------------|----------|
| ONTOLOGY           | Description                                                                                                               | P.adjust |
| BP                 | neutrophil degranulation                                                                                                  | 0.000149 |
| BP                 | neutrophil activation involved in immune response                                                                         | 0.000149 |
| BP                 | neutrophil mediated immunity                                                                                              | 0.000149 |
| BP                 | neutrophil activation                                                                                                     | 0.000149 |
| BP                 | protein targeting                                                                                                         | 0.002193 |
| BP                 | positive regulation of cytokine production                                                                                | 0.005486 |
| BP                 | response to steroid hormone                                                                                               | 0.013243 |
| BP                 | negative regulation of immune system process                                                                              | 0.013243 |
| BP                 | response to radiation                                                                                                     | 0.013243 |
| BP                 | intracellular receptor signaling pathway                                                                                  | 0.013243 |
| BP                 | macrophage activation                                                                                                     | 0.013243 |
| BP                 | regulation of nucleotide-binding oligomerization domain containing signaling pathway                                      | 0.013243 |
| BP                 | regulation of hemopoiesis                                                                                                 | 0.013243 |
| BP                 | regulation of leukocyte differentiation                                                                                   | 0.013266 |
| BP                 | alpha-beta T cell differentiation                                                                                         | 0.014715 |
| BP                 | fatty acid metabolic process                                                                                              | 0.016456 |
| BP                 | regulation of myeloid cell differentiation                                                                                | 0.017661 |
| BP                 | mucopolysaccharide metabolic process                                                                                      | 0.021516 |
| BP                 | regulation of myeloid leukocyte differentiation                                                                           | 0.024857 |
| BP                 | alpha-beta T cell activation                                                                                              | 0.028965 |
| BP                 | myeloid cell differentiation                                                                                              | 0.028965 |
| BP                 | circadian rhythm                                                                                                          | 0.029862 |
| BP                 | positive regulation of leukocyte differentiation                                                                          | 0.030266 |
| BP                 | positive regulation of hemopoiesis                                                                                        | 0.030266 |
| BP                 | extrinsic apoptotic signaling pathway                                                                                     | 0.030266 |
| BP                 | positive regulation of steroid biosynthetic process                                                                       | 0.030266 |
| BP                 | negative regulation of macrophage activation                                                                              | 0.030266 |
| BP                 | positive regulation of myeloid cell differentiation                                                                       | 0.032378 |
| BP                 | lymphocyte mediated immunity                                                                                              | 0.032378 |
| BP                 | response to lipopolysaccharide                                                                                            | 0.032378 |
| BP                 | regulation of lipid metabolic process                                                                                     | 0.032378 |
| BP                 | regulation of pattern recognition receptor signaling pathway                                                              | 0.032378 |
| BP                 | negative regulation of hemopoiesis                                                                                        | 0.032378 |
| BP                 | translational initiation                                                                                                  | 0.032378 |
| BP                 | rhythmic process                                                                                                          | 0.032378 |
| BP                 | adaptive immune response based on somatic recombination of immune receptors built from immunoglobulin superfamily domains | 0.032378 |
| BP                 | serine family amino acid biosynthetic process                                                                             | 0.032378 |
| BP                 | positive regulation of transforming growth factor beta                                                                    | 0.032378 |

|    |                                                          |          |
|----|----------------------------------------------------------|----------|
|    | production                                               |          |
| BP | chondroitin sulfate metabolic process                    | 0.032775 |
| BP | positive regulation of interleukin-10 production         | 0.032775 |
| BP | regulation of macrophage differentiation                 | 0.036217 |
| BP | protein transmembrane transport                          | 0.036579 |
| BP | cellular response to external stimulus                   | 0.036885 |
| BP | regulation of transforming growth factor beta production | 0.037772 |
| BP | humoral immune response                                  | 0.037772 |
| BP | protein refolding                                        | 0.037772 |
| BP | negative regulation of myeloid cell apoptotic process    | 0.037772 |
| BP | myeloid leukocyte differentiation                        | 0.038437 |
| BP | response to molecule of bacterial origin                 | 0.039642 |
| BP | transforming growth factor beta production               | 0.042176 |
| BP | chondroitin sulfate proteoglycan metabolic process       | 0.046184 |
| BP | chondroitin sulfate biosynthetic process                 | 0.046654 |
| BP | membrane raft organization                               | 0.046654 |
| BP | negative regulation of response to external stimulus     | 0.047895 |
| BP | negative regulation of myeloid cell differentiation      | 0.048573 |
| BP | protein targeting to ER                                  | 0.048573 |
| BP | circadian regulation of gene expression                  | 0.048573 |
| BP | homeostasis of number of cells                           | 0.048573 |
| BP | negative regulation of transport                         | 0.048691 |
| BP | protein targeting to peroxisome                          | 0.048691 |
| BP | protein localization to peroxisome                       | 0.048691 |
| BP | establishment of protein localization to peroxisome      | 0.048691 |
| BP | protein localization to endoplasmic reticulum            | 0.049046 |
| BP | L-serine metabolic process                               | 0.049659 |
| CC | focal adhesion                                           | 0.002905 |
| CC | cell-substrate junction                                  | 0.002905 |
| CC | lysosomal lumen                                          | 0.002905 |
| CC | ficolin-1-rich granule                                   | 0.004138 |
| CC | membrane raft                                            | 0.004207 |
| CC | membrane microdomain                                     | 0.004207 |
| CC | secretory granule membrane                               | 0.006477 |
| CC | peroxisomal matrix                                       | 0.006477 |
| CC | microbody lumen                                          | 0.006477 |
| CC | ficolin-1-rich granule lumen                             | 0.006477 |
| CC | organelle outer membrane                                 | 0.007182 |
| CC | tertiary granule lumen                                   | 0.007182 |
| CC | outer membrane                                           | 0.007182 |
| CC | mitochondrial outer membrane                             | 0.007895 |
| CC | tertiary granule                                         | 0.007895 |
| CC | vacuolar lumen                                           | 0.011314 |
| CC | blood microparticle                                      | 0.01281  |

|    |                                                |          |
|----|------------------------------------------------|----------|
| CC | cell-cell junction                             | 0.044649 |
| MF | ubiquitin-like protein ligase binding          | 0.044834 |
| MF | nuclear receptor activity                      | 0.044834 |
| MF | ligand-activated transcription factor activity | 0.044834 |

---

BP: biological process; CC: cell component; MF: molecular function
