# Supplementary material for: Effects and Prognostic Values of Circadian Genes CSNK1E/GNA11/KLF9/THRAP3 in Kidney Renal Clear Cell Carcinoma via a Comprehensive Analysis
Source: MDPI journal article supplement (doi:10.3390/bioengineering9070306), 2022-07-11
Supplement: s1 [file s1]

**Supplementary Table S4.****The expression levels of DERGs in the normal and KIRC tissues.**

| ID                           | CSNK1E   | GNA11    | KLF9     | THRAP3   | Type   |
|------------------------------|----------|----------|----------|----------|--------|
| TCGA-B2-5641-11A-01R-1541-07 | 8.200851 | 23.28076 | 18.87007 | 40.91592 | Normal |
| TCGA-CZ-5467-11A-01R-1503-07 | 7.98131  | 20.10002 | 40.11176 | 33.56335 | Normal |
| TCGA-B8-5552-11A-01R-1672-07 | 8.276639 | 9.74039  | 35.46106 | 45.2991  | Normal |
| TCGA-CZ-5455-11A-01R-1503-07 | 6.249228 | 16.52085 | 50.46896 | 36.04836 | Normal |
| TCGA-CZ-5470-11A-01R-1503-07 | 7.287639 | 17.77508 | 17.56212 | 35.64925 | Normal |
| TCGA-CJ-5676-11A-01R-1541-07 | 8.468139 | 14.85968 | 44.5875  | 23.23294 | Normal |
| TCGA-CW-5580-11A-02R-1672-07 | 8.5812   | 18.9083  | 75.24529 | 36.56068 | Normal |
| TCGA-B8-5549-11A-01R-1541-07 | 7.760626 | 20.28663 | 58.84236 | 47.64966 | Normal |
| TCGA-CZ-4865-11A-01R-1503-07 | 7.869122 | 17.85927 | 25.09362 | 37.30003 | Normal |
| TCGA-B0-5706-11A-01R-1541-07 | 10.17434 | 16.26611 | 47.74736 | 35.38681 | Normal |
| TCGA-B0-5690-11A-01R-1541-07 | 5.973464 | 19.5202  | 18.78483 | 35.09357 | Normal |
| TCGA-B8-4620-11A-01R-1758-07 | 9.579846 | 16.47719 | 54.80563 | 25.69752 | Normal |
| TCGA-CZ-5457-11A-01R-1503-07 | 7.588912 | 20.56985 | 23.50573 | 39.20399 | Normal |
| TCGA-CJ-5672-11A-01R-1541-07 | 7.74994  | 20.3557  | 31.22516 | 40.3813  | Normal |
| TCGA-B0-5691-11A-01R-1541-07 | 7.111735 | 16.27085 | 56.90067 | 35.06788 | Normal |
| TCGA-B0-5699-11A-01R-1541-07 | 5.779695 | 18.76377 | 43.44504 | 31.01661 | Normal |
| TCGA-CZ-5468-11A-01R-1503-07 | 8.820951 | 24.90771 | 16.60595 | 34.50163 | Normal |
| TCGA-CZ-5462-11A-01R-1503-07 | 5.966119 | 18.20965 | 14.74808 | 36.45577 | Normal |
| TCGA-B0-5697-11A-01R-1541-07 | 6.630032 | 21.54022 | 31.28429 | 33.4257  | Normal |
| TCGA-B0-5694-11A-01R-1541-07 | 9.455183 | 19.37598 | 26.48585 | 32.23407 | Normal |
| TCGA-CZ-5461-11A-01R-1503-07 | 6.627021 | 14.17403 | 38.9154  | 36.39342 | Normal |
| TCGA-B0-5696-11A-01R-1541-07 | 5.968307 | 18.23352 | 23.23076 | 33.34777 | Normal |
| TCGA-B0-5705-11A-01R-1541-07 | 7.035853 | 16.31953 | 50.13819 | 33.06134 | Normal |
| TCGA-CZ-5988-11A-01R-1672-07 | 5.951665 | 11.89319 | 51.33695 | 28.88932 | Normal |
| TCGA-CZ-5984-11A-01R-1672-07 | 6.833934 | 17.62346 | 32.65224 | 28.47548 | Normal |
| TCGA-B0-5402-11A-01R-1503-07 | 8.500569 | 16.29583 | 58.26614 | 28.23122 | Normal |
| TCGA-CZ-5458-11A-01R-1503-07 | 8.564627 | 18.49879 | 65.86105 | 35.41113 | Normal |
| TCGA-CZ-5469-11A-01R-1503-07 | 8.939133 | 16.847   | 53.27463 | 45.65748 | Normal |
| TCGA-CZ-5454-11A-01R-1503-07 | 9.948152 | 16.73254 | 62.01754 | 40.55651 | Normal |
| TCGA-CZ-5463-11A-01R-1503-07 | 7.51625  | 21.59393 | 43.41948 | 38.98843 | Normal |
| TCGA-CJ-5681-11A-01R-1541-07 | 8.964407 | 17.96202 | 28.26156 | 31.13927 | Normal |
| TCGA-CZ-4863-11A-01R-1503-07 | 6.672285 | 15.05836 | 17.14297 | 34.9168  | Normal |
| TCGA-A3-3387-11A-01R-1541-07 | 4.401566 | 12.16573 | 47.4038  | 18.87129 | Normal |
| TCGA-B2-5636-11A-01R-1541-07 | 6.512236 | 17.28266 | 17.78836 | 31.4014  | Normal |
| TCGA-CZ-5986-11A-01R-1672-07 | 7.038358 | 13.49542 | 29.3083  | 30.8523  | Normal |
| TCGA-CJ-5689-11A-01R-1541-07 | 10.94515 | 19.81258 | 32.02372 | 38.69643 | Normal |
| TCGA-B0-5711-11A-01R-1672-07 | 7.529855 | 15.997   | 31.94432 | 40.35073 | Normal |
| TCGA-CW-5585-11A-01R-1541-07 | 6.517995 | 19.38217 | 41.31248 | 29.64985 | Normal |
| TCGA-CZ-5451-11A-01R-1503-07 | 5.759695 | 17.29177 | 45.22948 | 28.97114 | Normal |
| TCGA-CZ-5982-11A-01R-1672-07 | 4.235611 | 14.5637  | 54.37833 | 25.21369 | Normal |
| TCGA-CZ-5465-11A-01R-1503-07 | 8.542989 | 21.43844 | 22.30703 | 40.08595 | Normal |

|                              |          |          |          |          |        |
|------------------------------|----------|----------|----------|----------|--------|
| TCGA-CW-5584-11A-01R-1541-07 | 9.911833 | 19.03534 | 19.6871  | 40.3589  | Normal |
| TCGA-CJ-6033-11A-01R-1858-07 | 8.63797  | 17.0641  | 17.43467 | 30.23335 | Normal |
| TCGA-CJ-5680-11A-01R-1541-07 | 16.10212 | 18.56622 | 26.81498 | 39.51652 | Normal |
| TCGA-B0-4712-11A-02R-1503-07 | 8.444621 | 19.67959 | 18.64651 | 45.30611 | Normal |
| TCGA-B0-5703-11A-01R-1541-07 | 9.040364 | 13.90006 | 32.31121 | 28.65326 | Normal |
| TCGA-B0-5712-11A-01R-1672-07 | 11.0956  | 16.47923 | 45.98981 | 35.04885 | Normal |
| TCGA-CZ-5989-11A-01R-1672-07 | 10.96492 | 18.15407 | 20.67531 | 43.51735 | Normal |
| TCGA-A3-3358-11A-01R-1541-07 | 4.789163 | 11.58383 | 31.66857 | 20.80957 | Normal |
| TCGA-CZ-5987-11A-01R-1672-07 | 9.194493 | 12.99497 | 38.31609 | 35.89592 | Normal |
| TCGA-CJ-6030-11A-01R-1672-07 | 6.1125   | 14.59991 | 30.91511 | 25.4117  | Normal |
| TCGA-CW-5581-11A-01R-1541-07 | 6.091654 | 18.97004 | 32.6594  | 31.68061 | Normal |
| TCGA-CZ-5456-11A-02R-1503-07 | 9.33913  | 20.77696 | 48.25356 | 33.53102 | Normal |
| TCGA-CJ-5677-11A-01R-1541-07 | 7.130073 | 18.2533  | 21.58389 | 30.28712 | Normal |
| TCGA-B0-5709-11A-01R-1541-07 | 7.26128  | 14.73291 | 28.70949 | 31.5878  | Normal |
| TCGA-B0-4700-11A-01R-1541-07 | 7.686941 | 15.80978 | 24.91732 | 23.52292 | Normal |
| TCGA-CJ-5679-11A-01R-1541-07 | 9.539412 | 18.28782 | 25.57521 | 32.44012 | Normal |
| TCGA-CW-5591-11A-01R-1541-07 | 11.93275 | 14.25436 | 14.62104 | 26.4869  | Normal |
| TCGA-CJ-5678-11A-01R-1541-07 | 5.209366 | 15.70912 | 20.08998 | 24.80466 | Normal |
| TCGA-CZ-5985-11A-01R-1672-07 | 4.764532 | 7.953561 | 55.00626 | 27.85052 | Normal |
| TCGA-CW-6090-11A-01R-1672-07 | 4.900191 | 12.04767 | 22.56633 | 29.89747 | Normal |
| TCGA-CW-5589-11A-01R-1541-07 | 6.162663 | 16.88759 | 36.36864 | 35.18222 | Normal |
| TCGA-CW-5587-11A-01R-1541-07 | 4.645625 | 15.77826 | 20.38657 | 36.16406 | Normal |
| TCGA-CZ-5452-11A-01R-1503-07 | 8.650181 | 22.16214 | 24.43285 | 33.21855 | Normal |
| TCGA-CW-6088-11A-01R-1672-07 | 7.101418 | 19.30451 | 27.86631 | 42.62425 | Normal |
| TCGA-CZ-5466-11A-01R-1503-07 | 5.640437 | 13.61267 | 26.87546 | 28.29014 | Normal |
| TCGA-B0-5701-11A-01R-1541-07 | 8.984716 | 19.53727 | 58.12851 | 34.54678 | Normal |
| TCGA-B8-4619-11A-01R-1758-07 | 4.378968 | 11.00701 | 46.75758 | 17.0739  | Normal |
| TCGA-CZ-5453-11A-01R-1503-07 | 8.218431 | 19.76054 | 33.11137 | 37.84386 | Normal |
| TCGA-CZ-4864-11A-01R-1503-07 | 4.904772 | 13.70675 | 40.76839 | 22.622   | Normal |
| TCGA-B8-4622-11A-01R-1758-07 | 4.647518 | 12.28946 | 33.08386 | 16.43047 | Normal |
| TCGA-CW-6087-11A-01R-1672-07 | 5.139926 | 12.48018 | 21.11464 | 28.1775  | Normal |
| TCGA-CJ-6033-01A-11R-1672-07 | 17.44806 | 12.5952  | 15.11387 | 25.0074  | Tumor  |
| TCGA-B0-5706-01A-11R-1541-07 | 22.24121 | 9.868628 | 23.92232 | 30.42275 | Tumor  |
| TCGA-CW-5587-01A-01R-1541-07 | 7.78657  | 14.31081 | 22.34751 | 37.20058 | Tumor  |
| TCGA-CZ-4864-01A-01R-1503-07 | 12.25581 | 11.07817 | 44.14703 | 25.74025 | Tumor  |
| TCGA-B2-5636-01A-02R-1541-07 | 15.14181 | 21.16055 | 21.9347  | 34.69372 | Tumor  |
| TCGA-CZ-5987-01A-11R-1672-07 | 14.17599 | 8.573845 | 15.80577 | 24.74942 | Tumor  |
| TCGA-CZ-5468-01A-01R-1503-07 | 11.40868 | 11.07766 | 15.34892 | 23.15447 | Tumor  |
| TCGA-CW-6090-01A-11R-1672-07 | 14.76876 | 6.906149 | 15.25174 | 30.42856 | Tumor  |
| TCGA-B0-4700-01A-02R-1541-07 | 18.6853  | 8.937563 | 19.10088 | 23.95656 | Tumor  |
| TCGA-B0-5705-01A-11R-1541-07 | 14.38635 | 13.42315 | 37.31432 | 32.79666 | Tumor  |
| TCGA-CZ-5984-01A-11R-1672-07 | 9.582389 | 9.087706 | 14.68549 | 24.25699 | Tumor  |
| TCGA-CJ-5678-01A-11R-1541-07 | 7.487363 | 7.549766 | 15.37718 | 17.7321  | Tumor  |
| TCGA-CZ-5467-01A-01R-1503-07 | 15.63999 | 15.71857 | 68.28659 | 38.84928 | Tumor  |

|                              |          |          |          |          |       |
|------------------------------|----------|----------|----------|----------|-------|
| TCGA-B0-5690-01A-11R-1541-07 | 22.79403 | 19.54458 | 27.53565 | 36.35623 | Tumor |
| TCGA-CZ-5452-01A-01R-1503-07 | 12.98166 | 10.12779 | 11.80459 | 28.22022 | Tumor |
| TCGA-CZ-4865-01A-02R-1503-07 | 17.37491 | 14.68549 | 19.77904 | 36.29934 | Tumor |
| TCGA-CZ-5453-01A-01R-1503-07 | 18.00342 | 17.31306 | 29.142   | 26.2954  | Tumor |
| TCGA-B8-4619-01A-02R-1325-07 | 11.03643 | 39.07485 | 45.79338 | 19.16131 | Tumor |
| TCGA-CJ-5676-01A-11R-1541-07 | 16.92515 | 10.18955 | 21.87654 | 20.59751 | Tumor |
| TCGA-B0-5703-01A-11R-1541-07 | 13.07516 | 14.23707 | 42.17841 | 17.68782 | Tumor |
| TCGA-B0-5694-01A-11R-1541-07 | 15.47297 | 9.817271 | 14.19227 | 25.22591 | Tumor |
| TCGA-B0-5711-01A-11R-1672-07 | 12.80824 | 11.68401 | 33.0402  | 37.79452 | Tumor |
| TCGA-CJ-5689-01A-11R-1541-07 | 13.71226 | 12.97709 | 24.6975  | 25.71975 | Tumor |
| TCGA-CZ-5986-01A-11R-1672-07 | 12.93177 | 6.347526 | 34.43361 | 38.75841 | Tumor |
| TCGA-CZ-5458-01A-01R-1503-07 | 14.36833 | 13.82999 | 52.02622 | 31.48245 | Tumor |
| TCGA-A3-3387-01A-01R-1541-07 | 13.51763 | 10.31785 | 33.57329 | 30.2196  | Tumor |
| TCGA-CZ-5465-01A-01R-1503-07 | 29.49574 | 9.386246 | 24.28698 | 42.95032 | Tumor |
| TCGA-B8-5549-01A-01R-1541-07 | 8.787499 | 16.4312  | 42.2397  | 26.37845 | Tumor |
| TCGA-CW-5585-01A-01R-1541-07 | 12.76567 | 19.79447 | 56.50501 | 36.49423 | Tumor |
| TCGA-CZ-5469-01A-01R-1503-07 | 13.78127 | 9.662187 | 16.18244 | 11.97004 | Tumor |
| TCGA-B0-5699-01A-11R-1541-07 | 14.32529 | 13.20961 | 31.11971 | 41.52119 | Tumor |
| TCGA-B8-4622-01A-02R-1277-07 | 15.87268 | 10.35121 | 24.90062 | 28.7691  | Tumor |
| TCGA-B8-5552-01B-11R-1672-07 | 14.73515 | 17.10508 | 35.81877 | 36.08905 | Tumor |
| TCGA-CJ-5677-01A-11R-1541-07 | 12.55859 | 10.00209 | 7.496649 | 17.95047 | Tumor |
| TCGA-CZ-4863-01A-01R-1503-07 | 12.06066 | 13.14788 | 30.94017 | 30.72679 | Tumor |
| TCGA-B0-5691-01A-11R-1541-07 | 12.4203  | 19.58848 | 85.44491 | 37.83965 | Tumor |
| TCGA-B2-5641-01A-01R-1541-07 | 10.43229 | 12.13997 | 9.40661  | 30.62533 | Tumor |
| TCGA-B0-5709-01A-11R-1541-07 | 13.86616 | 16.79401 | 35.64279 | 30.82362 | Tumor |
| TCGA-CW-6087-01A-11R-1672-07 | 8.734051 | 7.428645 | 6.593661 | 36.85149 | Tumor |
| TCGA-CZ-5988-01A-11R-1672-07 | 16.74078 | 6.344174 | 45.74824 | 35.73969 | Tumor |
| TCGA-CW-5591-01A-01R-1541-07 | 9.847636 | 20.96963 | 14.55527 | 40.0725  | Tumor |
| TCGA-CZ-5470-01A-01R-1503-07 | 8.877605 | 7.95764  | 15.4009  | 26.85256 | Tumor |
| TCGA-B0-5402-01A-01R-1503-07 | 14.2158  | 9.239281 | 51.43322 | 41.70718 | Tumor |
| TCGA-CW-5584-01A-01R-1541-07 | 13.33498 | 19.28978 | 23.29167 | 33.61886 | Tumor |
| TCGA-CW-5589-01A-01R-1541-07 | 11.77195 | 15.72443 | 50.28699 | 34.93869 | Tumor |
| TCGA-B0-5701-01A-11R-1541-07 | 5.742902 | 12.33671 | 17.84854 | 25.52251 | Tumor |
| TCGA-CZ-5989-01A-11R-1672-07 | 4.21325  | 1.056843 | 61.8545  | 30.85071 | Tumor |
| TCGA-CZ-5454-01A-01R-1503-07 | 9.191559 | 6.454781 | 27.9149  | 29.44733 | Tumor |
| TCGA-CJ-5679-01A-11R-1541-07 | 12.53679 | 8.570187 | 13.95426 | 14.62141 | Tumor |
| TCGA-CZ-5461-01A-01R-1503-07 | 11.29654 | 14.17786 | 19.6552  | 31.6479  | Tumor |
| TCGA-B0-4712-01A-01R-1503-07 | 8.690223 | 6.530278 | 11.93224 | 16.81082 | Tumor |
| TCGA-CW-6088-01A-11R-1672-07 | 21.72833 | 14.27134 | 40.98239 | 42.33203 | Tumor |
| TCGA-CZ-5982-01A-11R-1672-07 | 17.41574 | 14.28458 | 39.89197 | 34.06878 | Tumor |
| TCGA-CW-5580-01A-01R-1672-07 | 11.64233 | 9.205931 | 45.49045 | 36.86224 | Tumor |
| TCGA-B0-5696-01A-11R-1541-07 | 15.75471 | 14.05231 | 22.6307  | 25.16227 | Tumor |
| TCGA-CZ-5455-01A-01R-1503-07 | 9.726066 | 10.19172 | 48.96944 | 40.24746 | Tumor |
| TCGA-CZ-5451-01A-01R-1503-07 | 12.94746 | 15.16322 | 60.65176 | 24.97695 | Tumor |

|                              |          |          |          |          |       |
|------------------------------|----------|----------|----------|----------|-------|
| TCGA-CJ-5681-01A-11R-1541-07 | 12.56301 | 9.848428 | 10.61927 | 35.62097 | Tumor |
| TCGA-B8-4620-01A-02R-1325-07 | 23.92161 | 9.272711 | 28.55303 | 27.10594 | Tumor |
| TCGA-CZ-5985-01A-11R-1672-07 | 8.906691 | 7.442531 | 18.13616 | 33.73848 | Tumor |
| TCGA-CW-5581-01A-02R-1541-07 | 21.57706 | 14.86998 | 24.19548 | 30.41702 | Tumor |
| TCGA-A3-3358-01A-01R-1541-07 | 10.25725 | 7.623357 | 28.83625 | 23.12184 | Tumor |
| TCGA-CJ-5680-01A-11R-1541-07 | 13.59305 | 15.04181 | 16.33047 | 35.64642 | Tumor |
| TCGA-CZ-5463-01A-01R-1503-07 | 10.11862 | 13.00901 | 33.18711 | 33.86939 | Tumor |
| TCGA-CZ-5466-01A-01R-1503-07 | 11.19341 | 11.57632 | 12.51595 | 22.43438 | Tumor |
| TCGA-CJ-6030-01A-11R-1672-07 | 15.8015  | 8.202332 | 18.06704 | 33.66194 | Tumor |
| TCGA-B0-5697-01A-11R-1541-07 | 11.23888 | 12.13463 | 16.91208 | 28.2204  | Tumor |
| TCGA-CZ-5462-01A-01R-1503-07 | 8.515887 | 10.07762 | 9.366032 | 24.41867 | Tumor |
| TCGA-CZ-5456-01A-01R-1503-07 | 11.29513 | 9.045019 | 8.527638 | 25.96406 | Tumor |
| TCGA-CJ-5672-01A-11R-1541-07 | 10.3444  | 12.42149 | 17.39823 | 24.65822 | Tumor |
| TCGA-B0-5712-01A-11R-1672-07 | 12.8914  | 10.48443 | 22.47344 | 24.60394 | Tumor |
| TCGA-CZ-5457-01A-01R-1503-07 | 8.087824 | 13.74325 | 42.24481 | 25.39984 | Tumor |
