# Supplementary material for: Effects and Prognostic Values of Circadian Genes CSNK1E/GNA11/KLF9/THRAP3 in Kidney Renal Clear Cell Carcinoma via a Comprehensive Analysis
Source: MDPI journal article supplement (doi:10.3390/bioengineering9070306), 2022-07-11
Supplement: s1 [file s1]

**Supplementary Table S3.****The KEGG pathway enrichment analysis**

| ID       | Description                                                                | P.adjust    |
|----------|----------------------------------------------------------------------------|-------------|
| hsa05417 | Lipid and atherosclerosis                                                  | 0.004841957 |
| hsa05145 | Toxoplasmosis                                                              | 0.004841957 |
| hsa04210 | Apoptosis                                                                  | 0.004841957 |
| hsa04142 | Lysosome                                                                   | 0.009512787 |
| hsa05171 | Coronavirus disease - COVID-19                                             | 0.012288145 |
| hsa05142 | Chagas disease                                                             | 0.019348948 |
| hsa04146 | Peroxisome                                                                 | 0.019348948 |
| hsa04610 | Complement and coagulation cascades                                        | 0.021590778 |
| hsa05152 | Tuberculosis                                                               | 0.022415539 |
| hsa00532 | Glycosaminoglycan biosynthesis - chondroitin sulfate /<br>dermatan sulfate | 0.02544765  |
| hsa05162 | Measles                                                                    | 0.028562598 |
| hsa05133 | Pertussis                                                                  | 0.035832259 |
