# Supplementary material for: Effects and Prognostic Values of Circadian Genes CSNK1E/GNA11/KLF9/THRAP3 in Kidney Renal Clear Cell Carcinoma via a Comprehensive Analysis
Source: MDPI journal article supplement (doi:10.3390/bioengineering9070306), 2022-07-11
Supplement: s1 [file s1]

**Supplementary Table S1. The 553 DERGs between KIRC samples and normal tissue samples.**

| ID       | conMean  | treatMean | logFC    | P        | P.adjust |
|----------|----------|-----------|----------|----------|----------|
| ABCA1    | 3.708622 | 11.22317  | 7.514551 | 2.81E-31 | 2.73E-30 |
| ABCB1    | 22.41782 | 6.986941  | -15.4309 | 5.76E-35 | 1.14E-33 |
| ABCD1    | 3.263849 | 6.661305  | 3.397456 | 1.62E-31 | 1.63E-30 |
| ABCG1    | 5.00024  | 12.12079  | 7.120546 | 5.52E-28 | 3.61E-27 |
| ABHD2    | 17.69889 | 14.30813  | -3.39076 | 5.30E-14 | 1.26E-13 |
| ABHD4    | 17.21864 | 10.60772  | -6.61092 | 2.29E-29 | 1.74E-28 |
| ABHD5    | 6.139994 | 3.129966  | -3.01003 | 2.44E-35 | 5.30E-34 |
| ABLM1    | 32.70976 | 16.50872  | -16.201  | 1.34E-34 | 2.44E-33 |
| ACADSB   | 31.33015 | 8.13349   | -23.1967 | 2.12E-35 | 4.69E-34 |
| ACOX1    | 16.41348 | 8.612776  | -7.80071 | 1.03E-30 | 9.23E-30 |
| ACSL1    | 73.25728 | 42.67917  | -30.5781 | 4.62E-18 | 1.40E-17 |
| ADAMTSL4 | 0.748161 | 3.312092  | 2.563931 | 1.58E-29 | 1.23E-28 |
| ADM      | 12.07184 | 80.42273  | 68.3509  | 4.95E-37 | 1.90E-35 |
| AGMAT    | 68.35659 | 13.51153  | -54.8451 | 5.88E-08 | 9.89E-08 |
| AGPAT5   | 8.906813 | 11.18552  | 2.278709 | 0.000262 | 0.00035  |
| AGTRAP   | 16.84731 | 19.92438  | 3.077071 | 0.000629 | 0.00082  |
| AK3      | 41.77614 | 15.12057  | -26.6556 | 1.50E-39 | 1.71E-37 |
| AKAP1    | 14.59231 | 10.3092   | -4.28311 | 5.68E-18 | 1.72E-17 |
| ALKBH2   | 3.312506 | 5.454638  | 2.142132 | 2.17E-19 | 7.24E-19 |
| ALOX5AP  | 3.809421 | 8.712633  | 4.903212 | 2.67E-15 | 6.88E-15 |
| AMIGO2   | 5.889988 | 3.650629  | -2.23936 | 2.42E-17 | 7.02E-17 |
| ANK3     | 7.225486 | 2.98583   | -4.23966 | 9.90E-31 | 8.90E-30 |
| AOAH     | 1.455888 | 6.79414   | 5.338252 | 7.55E-30 | 6.04E-29 |
| AOC3     | 13.17125 | 11.05619  | -2.11506 | 0.003837 | 0.00474  |
| AP1G1    | 16.40916 | 11.26206  | -5.1471  | 1.57E-26 | 9.03E-26 |
| APOL1    | 25.99648 | 107.0531  | 81.05659 | 5.05E-25 | 2.56E-24 |
| APOL2    | 11.78701 | 30.35295  | 18.56594 | 4.11E-32 | 4.57E-31 |
| APPL1    | 11.20906 | 7.7208    | -3.48826 | 8.76E-22 | 3.45E-21 |
| AQP3     | 181.3012 | 38.36542  | -142.936 | 1.11E-34 | 2.06E-33 |
| AQP9     | 0.9126   | 4.128872  | 3.216272 | 1.69E-16 | 4.68E-16 |
| ARAP3    | 3.677319 | 7.357245  | 3.679927 | 1.07E-15 | 2.83E-15 |
| ARHGAP26 | 2.18487  | 4.63086   | 2.44599  | 8.75E-24 | 3.99E-23 |
| ARHGAP9  | 0.499732 | 3.005669  | 2.505936 | 1.97E-35 | 4.41E-34 |
| ARID5B   | 16.87803 | 13.13829  | -3.73975 | 1.26E-05 | 1.84E-05 |
| ARMCX2   | 18.38109 | 11.20458  | -7.17651 | 3.30E-22 | 1.34E-21 |
| ARSA     | 9.159227 | 14.38555  | 5.226323 | 3.07E-16 | 8.37E-16 |
| ARSB     | 6.764135 | 9.017143  | 2.253008 | 4.30E-06 | 6.45E-06 |
| ASAH1    | 94.30864 | 60.2886   | -34.02   | 7.91E-19 | 2.53E-18 |
| ASL      | 14.22971 | 11.38717  | -2.84254 | 8.04E-05 | 0.000111 |
| ASNS     | 3.074277 | 5.472398  | 2.398121 | 4.04E-14 | 9.66E-14 |
| ATP1B1   | 828.4411 | 321.4619  | -506.979 | 2.04E-34 | 3.56E-33 |

|           |          |          |          |          |          |
|-----------|----------|----------|----------|----------|----------|
| ATP6V0B   | 44.44569 | 28.22016 | -16.2255 | 1.16E-26 | 6.73E-26 |
| B3GNT8    | 3.554914 | 1.363082 | -2.19183 | 1.57E-24 | 7.65E-24 |
| B4GALT5   | 23.75475 | 32.83063 | 9.075883 | 7.92E-11 | 1.57E-10 |
| BAG3      | 31.11988 | 24.30286 | -6.81702 | 8.05E-12 | 1.69E-11 |
| BASP1     | 5.412059 | 9.958193 | 4.546134 | 0.003786 | 0.00468  |
| BBS2      | 7.822712 | 5.277428 | -2.54528 | 3.88E-27 | 2.35E-26 |
| BCKDHB    | 10.6194  | 4.431453 | -6.18795 | 1.10E-35 | 2.63E-34 |
| BCL2      | 8.339657 | 14.15354 | 5.81388  | 1.53E-11 | 3.16E-11 |
| BCL2A1    | 0.734245 | 4.224732 | 3.490487 | 3.66E-31 | 3.49E-30 |
| BCL3      | 8.920746 | 13.69738 | 4.776639 | 1.75E-08 | 3.04E-08 |
| BCL6      | 8.165669 | 12.92138 | 4.755706 | 2.24E-12 | 4.86E-12 |
| BCL7A     | 7.701682 | 3.780898 | -3.92078 | 1.03E-30 | 9.23E-30 |
| BEX2      | 28.04342 | 13.75274 | -14.2907 | 5.73E-25 | 2.89E-24 |
| BIRC3     | 5.138882 | 25.90594 | 20.76706 | 1.64E-29 | 1.27E-28 |
| BRCC3     | 9.277266 | 4.483319 | -4.79395 | 1.23E-36 | 4.06E-35 |
| C14orf132 | 3.878622 | 1.421125 | -2.4575  | 6.14E-24 | 2.84E-23 |
| C1orf54   | 4.916049 | 10.35624 | 5.440192 | 2.10E-23 | 9.36E-23 |
| C1QA      | 30.67384 | 188.6314 | 157.9576 | 8.09E-34 | 1.25E-32 |
| C1QB      | 23.21478 | 179.5414 | 156.3266 | 2.69E-35 | 5.80E-34 |
| C1RL      | 7.904779 | 12.60623 | 4.70145  | 2.87E-13 | 6.56E-13 |
| C20orf27  | 6.451381 | 10.7942  | 4.342814 | 8.64E-27 | 5.08E-26 |
| C2orf40   | 9.485874 | 2.44562  | -7.04025 | 1.89E-24 | 9.11E-24 |
| C5AR1     | 3.605504 | 9.359148 | 5.753644 | 3.16E-23 | 1.38E-22 |
| C8orf59   | 5.510342 | 9.261309 | 3.750967 | 5.81E-25 | 2.93E-24 |
| CA4       | 10.62317 | 4.044866 | -6.5783  | 1.46E-20 | 5.28E-20 |
| CALCOCO2  | 14.8272  | 16.856   | 2.028796 | 1.39E-06 | 2.15E-06 |
| CAMK2N1   | 67.35548 | 44.81955 | -22.5359 | 1.65E-19 | 5.56E-19 |
| CAMKK2    | 6.808224 | 9.818812 | 3.010588 | 3.22E-24 | 1.52E-23 |
| CAPRIN1   | 35.20789 | 27.59648 | -7.61142 | 2.70E-12 | 5.83E-12 |
| CASP8     | 3.051398 | 5.167046 | 2.115648 | 3.53E-27 | 2.15E-26 |
| CCDC85B   | 5.374664 | 14.15027 | 8.775611 | 6.19E-18 | 1.87E-17 |
| CD200     | 4.497831 | 14.55638 | 10.05855 | 1.41E-30 | 1.24E-29 |
| CD248     | 8.726147 | 29.9107  | 21.18456 | 1.82E-23 | 8.15E-23 |
| CD300LF   | 0.324951 | 2.637871 | 2.31292  | 1.03E-37 | 5.17E-36 |
| CD3E      | 1.760655 | 11.22003 | 9.459376 | 8.19E-29 | 5.87E-28 |
| CD46      | 45.51721 | 31.79655 | -13.7207 | 4.71E-20 | 1.64E-19 |
| CD5       | 0.624199 | 2.728489 | 2.10429  | 3.32E-26 | 1.86E-25 |
| CD83      | 13.72935 | 7.514685 | -6.21467 | 4.27E-22 | 1.72E-21 |
| CD8B      | 0.386198 | 4.244911 | 3.858713 | 2.84E-29 | 2.14E-28 |
| CD93      | 21.28892 | 45.23347 | 23.94454 | 1.38E-14 | 3.40E-14 |
| CDC42EP2  | 7.538463 | 4.82189  | -2.71657 | 9.46E-14 | 2.22E-13 |
| CDC42SE1  | 17.75644 | 20.49778 | 2.741341 | 0.000242 | 0.000324 |
| CDCA7L    | 1.556092 | 5.368508 | 3.812416 | 1.38E-29 | 1.08E-28 |
| CDIPT     | 30.46326 | 33.65852 | 3.195268 | 0.001795 | 0.00227  |

|         |          |          |          |          |          |
|---------|----------|----------|----------|----------|----------|
| CEACAM1 | 9.381275 | 4.287133 | -5.09414 | 4.59E-25 | 2.33E-24 |
| CFLAR   | 7.285139 | 10.01466 | 2.72952  | 4.84E-10 | 9.15E-10 |
| CHCHD7  | 5.325074 | 3.321312 | -2.00376 | 2.86E-30 | 2.42E-29 |
| CHMP1A  | 27.3901  | 31.35873 | 3.968631 | 3.37E-06 | 5.10E-06 |
| CHPF2   | 9.113143 | 14.58862 | 5.47548  | 3.97E-23 | 1.73E-22 |
| CHST11  | 2.084835 | 7.156856 | 5.072021 | 1.13E-32 | 1.41E-31 |
| CHST15  | 5.040471 | 16.10055 | 11.06008 | 3.49E-23 | 1.52E-22 |
| CHSY1   | 9.321054 | 15.34775 | 6.026693 | 1.94E-14 | 4.74E-14 |
| CLEC18B | 2.434091 | 8.341672 | 5.90758  | 3.02E-11 | 6.13E-11 |
| CLEC2D  | 0.407064 | 2.439842 | 2.032777 | 5.72E-37 | 2.16E-35 |
| CLYBL   | 5.769119 | 3.141868 | -2.62725 | 4.87E-25 | 2.47E-24 |
| CNPY3   | 25.61487 | 41.61806 | 16.00319 | 1.61E-23 | 7.23E-23 |
| CORO1C  | 12.86158 | 27.06598 | 14.2044  | 1.04E-29 | 8.27E-29 |
| COX11   | 9.835101 | 7.382638 | -2.45246 | 7.62E-23 | 3.24E-22 |
| CPD     | 14.74171 | 12.17356 | -2.56815 | 9.21E-10 | 1.72E-09 |
| CPNE2   | 3.969902 | 7.721785 | 3.751883 | 4.39E-26 | 2.44E-25 |
| CPPED1  | 11.46699 | 9.120413 | -2.34658 | 4.80E-17 | 1.37E-16 |
| CRAT    | 24.51782 | 19.37218 | -5.14564 | 1.48E-05 | 2.14E-05 |
| CREB5   | 1.370993 | 3.918881 | 2.547888 | 6.59E-25 | 3.31E-24 |
| CRIP2   | 26.24171 | 36.74781 | 10.5061  | 8.87E-06 | 1.31E-05 |
| CSAD    | 1.59029  | 4.768674 | 3.178384 | 1.24E-13 | 2.90E-13 |
| CSF2RA  | 0.940422 | 3.654181 | 2.713759 | 1.91E-30 | 1.65E-29 |
| CSF2RB  | 1.354506 | 3.549223 | 2.194716 | 3.25E-23 | 1.42E-22 |
| CSF3R   | 0.361273 | 2.497307 | 2.136034 | 4.99E-36 | 1.32E-34 |
| CSNK1E  | 7.571308 | 16.32325 | 8.751937 | 1.42E-33 | 2.08E-32 |
| CSRNP1  | 25.93427 | 19.58891 | -6.34536 | 0.00026  | 0.000347 |
| CST7    | 2.11586  | 18.83099 | 16.71513 | 2.68E-34 | 4.54E-33 |
| CTSD    | 358.2716 | 492.7713 | 134.4997 | 0.000302 | 0.000402 |
| CTSF    | 38.62964 | 30.48287 | -8.14677 | 5.44E-10 | 1.03E-09 |
| CTSS    | 10.84666 | 41.53151 | 30.68485 | 2.94E-29 | 2.21E-28 |
| CUEDC1  | 7.82613  | 5.514696 | -2.31143 | 4.10E-14 | 9.82E-14 |
| CXCL2   | 2.54818  | 7.809354 | 5.261174 | 8.04E-08 | 1.34E-07 |
| CYBRD1  | 24.00065 | 16.79213 | -7.20852 | 8.99E-09 | 1.59E-08 |
| CYCS    | 44.32218 | 24.96538 | -19.3568 | 1.14E-27 | 7.25E-27 |
| CYP27A1 | 19.02721 | 26.70892 | 7.681707 | 0.000344 | 0.000455 |
| CYP2J2  | 1.43727  | 52.21074 | 50.77346 | 1.17E-30 | 1.04E-29 |
| CYP4F2  | 12.57278 | 0.401399 | -12.1714 | 4.28E-17 | 1.22E-16 |
| DBN1    | 18.77863 | 11.72747 | -7.05115 | 7.92E-17 | 2.23E-16 |
| DDIT4   | 32.32599 | 145.0283 | 112.7023 | 2.24E-31 | 2.21E-30 |
| DDR1    | 28.61029 | 21.50423 | -7.10606 | 3.64E-11 | 7.36E-11 |
| DDX24   | 22.57221 | 15.83585 | -6.73636 | 4.20E-19 | 1.37E-18 |
| DENND2A | 6.320179 | 3.718882 | -2.6013  | 3.78E-11 | 7.64E-11 |
| DNAJC16 | 7.811367 | 4.471382 | -3.33999 | 3.10E-18 | 9.51E-18 |
| DNAJC19 | 13.72759 | 7.641432 | -6.08616 | 1.65E-25 | 8.72E-25 |

|          |          |          |          |          |          |
|----------|----------|----------|----------|----------|----------|
| DNM1L    | 12.51149 | 9.173188 | -3.33831 | 3.77E-23 | 1.64E-22 |
| DOCK10   | 1.270712 | 3.489792 | 2.21908  | 1.57E-26 | 9.03E-26 |
| DOCK4    | 2.353754 | 4.745519 | 2.391765 | 3.51E-21 | 1.32E-20 |
| DOK4     | 10.6495  | 17.68462 | 7.035121 | 6.11E-21 | 2.26E-20 |
| DTX3L    | 8.173414 | 15.39688 | 7.223463 | 1.60E-26 | 9.16E-26 |
| DUSP1    | 263.0088 | 508.0493 | 245.0404 | 5.04E-12 | 1.07E-11 |
| DYRK2    | 2.744663 | 4.757756 | 2.013093 | 1.40E-22 | 5.82E-22 |
| DYSF     | 6.811971 | 19.42915 | 12.61718 | 4.99E-28 | 3.27E-27 |
| EBF1     | 2.793446 | 4.920529 | 2.127083 | 1.21E-10 | 2.37E-10 |
| ECE1     | 20.80825 | 29.02211 | 8.213859 | 9.59E-08 | 1.59E-07 |
| ECHDC2   | 5.631123 | 7.6704   | 2.039277 | 0.002043 | 0.002574 |
| ECHDC3   | 35.67388 | 20.62622 | -15.0477 | 4.68E-14 | 1.12E-13 |
| EGLN1    | 15.10646 | 19.67515 | 4.568692 | 6.04E-10 | 1.14E-09 |
| EIF3E    | 32.67195 | 46.66813 | 13.99619 | 4.18E-17 | 1.19E-16 |
| EIF4B    | 67.47185 | 87.50079 | 20.02893 | 2.58E-06 | 3.93E-06 |
| EML4     | 8.637393 | 11.67389 | 3.036499 | 1.06E-11 | 2.22E-11 |
| ENTPD1   | 3.469673 | 7.055872 | 3.586199 | 3.97E-28 | 2.64E-27 |
| EPHX2    | 37.34381 | 14.85867 | -22.4851 | 1.70E-26 | 9.71E-26 |
| EPM2AIP1 | 6.607721 | 4.544654 | -2.06307 | 2.73E-22 | 1.12E-21 |
| ERGIC1   | 15.29676 | 30.19893 | 14.90217 | 8.59E-29 | 6.15E-28 |
| ESYT2    | 23.13522 | 28.21412 | 5.078894 | 1.16E-05 | 1.70E-05 |
| EXOSC7   | 7.445503 | 3.940244 | -3.50526 | 7.18E-32 | 7.68E-31 |
| FAAH2    | 6.991615 | 3.940657 | -3.05096 | 6.92E-27 | 4.10E-26 |
| FABP5    | 1.39003  | 5.110483 | 3.720453 | 3.53E-28 | 2.36E-27 |
| FAM102A  | 20.81446 | 9.545372 | -11.2691 | 7.37E-30 | 5.91E-29 |
| FAM104B  | 7.064486 | 4.413896 | -2.65059 | 5.76E-36 | 1.50E-34 |
| FAM120A  | 30.82743 | 27.25996 | -3.56748 | 8.57E-07 | 1.34E-06 |
| FAM49A   | 1.325616 | 3.935573 | 2.609957 | 5.67E-29 | 4.13E-28 |
| FAM53B   | 5.252628 | 8.224893 | 2.972265 | 4.93E-19 | 1.60E-18 |
| FBLN5    | 41.05656 | 12.51782 | -28.5387 | 7.81E-32 | 8.27E-31 |
| FBXL16   | 4.415472 | 13.12623 | 8.710762 | 7.45E-15 | 1.87E-14 |
| FBXO21   | 21.66203 | 10.69091 | -10.9711 | 1.42E-31 | 1.44E-30 |
| FCGBP    | 6.326709 | 2.775545 | -3.55116 | 1.67E-09 | 3.08E-09 |
| FCGR2A   | 2.956442 | 10.95811 | 8.001668 | 2.18E-30 | 1.87E-29 |
| FGR      | 1.999402 | 5.741112 | 3.74171  | 1.98E-28 | 1.36E-27 |
| FKBP1A   | 58.67397 | 91.60547 | 32.9315  | 3.15E-24 | 1.49E-23 |
| FKBP8    | 75.18431 | 87.39309 | 12.20878 | 0.00078  | 0.001011 |
| FLOT1    | 56.90116 | 68.19959 | 11.29843 | 5.86E-08 | 9.85E-08 |
| FNDC3B   | 8.756091 | 13.12637 | 4.370278 | 8.36E-16 | 2.22E-15 |
| FOLR3    | 3.915703 | 0.365673 | -3.55003 | 2.43E-37 | 1.07E-35 |
| FOS      | 214.3126 | 134.7357 | -79.5769 | 1.05E-06 | 1.63E-06 |
| FOSL2    | 54.94295 | 38.89941 | -16.0435 | 5.11E-05 | 7.15E-05 |
| FOXJ1    | 2.582774 | 0.288897 | -2.29388 | 3.67E-35 | 7.59E-34 |
| FOXO1    | 10.36542 | 6.433892 | -3.93153 | 5.00E-27 | 3.00E-26 |

|           |          |          |          |          |          |
|-----------|----------|----------|----------|----------|----------|
| FSTL1     | 24.33877 | 62.91567 | 38.5769  | 6.50E-21 | 2.40E-20 |
| FURIN     | 31.93264 | 26.73636 | -5.19628 | 7.23E-05 | 0.0001   |
| GABARAPL1 | 84.36011 | 28.69902 | -55.6611 | 3.00E-37 | 1.26E-35 |
| GADD45B   | 72.17843 | 46.33684 | -25.8416 | 0.001376 | 0.001755 |
| GALNT14   | 23.56257 | 51.17547 | 27.6129  | 1.43E-25 | 7.61E-25 |
| GATA2     | 9.248066 | 3.141013 | -6.10705 | 2.79E-30 | 2.36E-29 |
| GATM      | 209.6253 | 49.78761 | -159.838 | 4.09E-08 | 6.94E-08 |
| GGA2      | 16.46377 | 13.53265 | -2.93112 | 8.38E-11 | 1.66E-10 |
| GIMAP7    | 13.68629 | 32.19384 | 18.50755 | 4.41E-20 | 1.54E-19 |
| GK        | 9.87484  | 3.711116 | -6.16372 | 1.11E-08 | 1.95E-08 |
| GNA11     | 16.93929 | 12.70962 | -4.22967 | 3.02E-18 | 9.28E-18 |
| GNAI2     | 29.26721 | 46.89073 | 17.62351 | 1.22E-22 | 5.11E-22 |
| GNG2      | 2.575745 | 4.720788 | 2.145044 | 8.71E-18 | 2.60E-17 |
| GNS       | 85.07344 | 61.508   | -23.5654 | 2.53E-18 | 7.83E-18 |
| GOLGA4    | 11.35533 | 6.674037 | -4.68129 | 3.10E-22 | 1.26E-21 |
| GOLGA8A   | 0.516654 | 3.861289 | 3.344635 | 6.98E-17 | 1.97E-16 |
| GPR27     | 3.575303 | 1.011471 | -2.56383 | 1.12E-30 | 9.98E-30 |
| GPRC5B    | 24.06027 | 10.38286 | -13.6774 | 6.82E-32 | 7.34E-31 |
| GPX7      | 5.056833 | 7.382328 | 2.325495 | 1.73E-07 | 2.83E-07 |
| GRASP     | 4.499951 | 7.634879 | 3.134928 | 2.02E-10 | 3.91E-10 |
| GRB10     | 6.63635  | 19.14037 | 12.50402 | 1.74E-27 | 1.09E-26 |
| GRPEL1    | 12.44054 | 10.10828 | -2.33226 | 1.19E-13 | 2.77E-13 |
| GTF2I     | 7.181461 | 4.788265 | -2.3932  | 5.62E-15 | 1.42E-14 |
| GZMB      | 0.760946 | 4.539313 | 3.778367 | 3.66E-32 | 4.09E-31 |
| HAAO      | 12.07116 | 16.35591 | 4.28475  | 2.80E-05 | 3.98E-05 |
| HABP4     | 11.22862 | 6.49039  | -4.73823 | 1.40E-28 | 9.76E-28 |
| HACL1     | 8.441884 | 4.338954 | -4.10293 | 6.40E-34 | 1.01E-32 |
| HAPLN3    | 0.60284  | 3.17085  | 2.56801  | 3.22E-32 | 3.64E-31 |
| HCK       | 2.050128 | 8.59168  | 6.541553 | 3.51E-33 | 4.77E-32 |
| HEPACAM2  | 11.08079 | 5.284465 | -5.79633 | 7.08E-36 | 1.80E-34 |
| HIST1H2BC | 2.682779 | 5.801799 | 3.11902  | 3.83E-06 | 5.77E-06 |
| HIST1H2BD | 20.65996 | 38.85701 | 18.19704 | 2.07E-11 | 4.24E-11 |
| HIST1H3H  | 0.456987 | 2.772095 | 2.315108 | 5.64E-21 | 2.09E-20 |
| HIST2H2BE | 14.70718 | 6.366503 | -8.34068 | 9.01E-15 | 2.24E-14 |
| HKDC1     | 6.337415 | 9.111058 | 2.773643 | 0.005028 | 0.006156 |
| HLA-DOA   | 8.590775 | 23.07658 | 14.48581 | 3.07E-14 | 7.41E-14 |
| HLX       | 0.745428 | 4.359823 | 3.614395 | 1.10E-35 | 2.63E-34 |
| HNRNPA1   | 83.96315 | 109.853  | 25.88989 | 1.50E-15 | 3.92E-15 |
| HNRNPU    | 50.23267 | 41.61491 | -8.61776 | 1.90E-08 | 3.29E-08 |
| HP        | 0.154782 | 22.07178 | 21.917   | 0.000889 | 0.001149 |
| HPRT1     | 27.55009 | 17.05547 | -10.4946 | 3.87E-25 | 1.97E-24 |
| HPS4      | 3.249671 | 5.399452 | 2.149781 | 1.23E-24 | 6.07E-24 |
| HSD17B8   | 22.78716 | 15.77633 | -7.01083 | 7.06E-17 | 1.99E-16 |
| HSPA1A    | 25.8369  | 20.02476 | -5.81213 | 8.42E-10 | 1.57E-09 |

|           |          |          |          |          |          |
|-----------|----------|----------|----------|----------|----------|
| HSPA1B    | 34.36926 | 20.54746 | -13.8218 | 6.12E-19 | 1.97E-18 |
| HSPA6     | 0.654533 | 2.747033 | 2.0925   | 2.90E-31 | 2.81E-30 |
| HSPA9     | 86.54257 | 75.37489 | -11.1677 | 5.13E-07 | 8.15E-07 |
| HTATSF1   | 33.82728 | 21.58515 | -12.2421 | 1.10E-22 | 4.62E-22 |
| IARS      | 16.28221 | 13.63785 | -2.64435 | 2.44E-10 | 4.70E-10 |
| IDH1      | 20.61761 | 13.44768 | -7.16993 | 1.98E-07 | 3.22E-07 |
| IDS       | 13.68833 | 18.4847  | 4.79637  | 2.86E-14 | 6.91E-14 |
| IFIT2     | 10.19798 | 12.47351 | 2.275527 | 0.000212 | 0.000286 |
| IFIT3     | 18.05817 | 24.52856 | 6.470387 | 1.29E-08 | 2.26E-08 |
| IGF2R     | 18.46043 | 15.7601  | -2.70032 | 2.98E-05 | 4.23E-05 |
| IGHD      | 3.479772 | 7.861654 | 4.381882 | 0.001316 | 0.001681 |
| IKBIP     | 3.956008 | 13.75193 | 9.795922 | 1.92E-36 | 5.86E-35 |
| IL13RA1   | 27.18502 | 30.22176 | 3.036747 | 0.009904 | 0.011873 |
| IL1R1     | 14.21186 | 10.91095 | -3.3009  | 4.99E-08 | 8.44E-08 |
| IL6ST     | 43.848   | 41.07022 | -2.77777 | 0.027334 | 0.031599 |
| IMPDH1    | 4.1779   | 7.764266 | 3.586366 | 8.68E-21 | 3.17E-20 |
| INHBB     | 1.785996 | 25.17631 | 23.39031 | 5.40E-38 | 3.07E-36 |
| IP6K1     | 14.97593 | 9.721777 | -5.25416 | 1.50E-31 | 1.52E-30 |
| IRF1      | 5.463306 | 12.014   | 6.550695 | 3.27E-20 | 1.15E-19 |
| IRF2      | 11.09789 | 14.1628  | 3.064906 | 1.76E-14 | 4.30E-14 |
| IRF7      | 3.246385 | 10.86633 | 7.619941 | 1.53E-29 | 1.19E-28 |
| ITCH      | 12.31945 | 10.00235 | -2.31711 | 3.29E-12 | 7.07E-12 |
| ITGA5     | 7.631389 | 29.35315 | 21.72176 | 9.55E-32 | 9.95E-31 |
| ITGA6     | 27.98663 | 36.50492 | 8.518296 | 0.001083 | 0.001392 |
| ITGAX     | 0.539689 | 5.246233 | 4.706544 | 2.83E-38 | 1.79E-36 |
| ITPK1     | 14.94286 | 11.49853 | -3.44432 | 8.71E-17 | 2.45E-16 |
| ITPKB     | 14.23015 | 7.495108 | -6.73504 | 1.33E-22 | 5.55E-22 |
| KCNE3     | 5.54053  | 25.4895  | 19.94897 | 5.53E-33 | 7.28E-32 |
| KCNJ15    | 35.48048 | 14.53453 | -20.946  | 2.06E-19 | 6.89E-19 |
| KCNJ2     | 1.090568 | 3.974674 | 2.884107 | 1.31E-24 | 6.42E-24 |
| KIAA0319L | 13.15013 | 10.13126 | -3.01887 | 4.30E-16 | 1.16E-15 |
| KIAA1147  | 10.14392 | 13.57711 | 3.433188 | 0.006081 | 0.0074   |
| KIF16B    | 6.790822 | 4.28173  | -2.50909 | 1.49E-25 | 7.88E-25 |
| LANCL1    | 24.1355  | 15.42175 | -8.71375 | 2.03E-24 | 9.77E-24 |
| LARP4     | 8.818792 | 6.394107 | -2.42468 | 7.99E-18 | 2.39E-17 |
| LAT2      | 0.871756 | 3.916974 | 3.045218 | 2.92E-35 | 6.23E-34 |
| LCN2      | 8.599859 | 3.208514 | -5.39134 | 8.73E-21 | 3.19E-20 |
| LDHB      | 428.8609 | 146.1951 | -282.666 | 8.55E-39 | 6.54E-37 |
| LDLR      | 6.40385  | 2.576844 | -3.82701 | 9.73E-21 | 3.55E-20 |
| LGALS9    | 2.135659 | 9.548851 | 7.413193 | 5.08E-36 | 1.34E-34 |
| LHFPL2    | 1.992209 | 7.892944 | 5.900734 | 6.03E-33 | 7.84E-32 |
| LILRB4    | 0.450544 | 3.973963 | 3.523419 | 1.48E-36 | 4.74E-35 |
| LIN7A     | 4.696997 | 8.417138 | 3.720141 | 0.019413 | 0.022741 |
| LITAF     | 63.51005 | 39.68115 | -23.8289 | 2.94E-19 | 9.69E-19 |

|          |          |          |          |          |          |
|----------|----------|----------|----------|----------|----------|
| LMNB1    | 1.941583 | 4.905947 | 2.964364 | 2.43E-26 | 1.38E-25 |
| LMO7     | 10.97208 | 4.721159 | -6.25092 | 9.04E-31 | 8.15E-30 |
| LPCAT1   | 7.316948 | 42.07853 | 34.76158 | 3.13E-36 | 8.74E-35 |
| LPCAT2   | 7.752124 | 4.107542 | -3.64458 | 1.01E-22 | 4.26E-22 |
| LRG1     | 2.489034 | 5.432122 | 2.943088 | 0.000358 | 0.000474 |
| LRP10    | 42.5187  | 25.19086 | -17.3278 | 2.62E-33 | 3.65E-32 |
| LRP6     | 7.652517 | 4.653744 | -2.99877 | 2.06E-20 | 7.34E-20 |
| LRPPRC   | 23.78099 | 16.70167 | -7.07932 | 1.89E-18 | 5.87E-18 |
| LTB4R    | 0.519578 | 3.043058 | 2.52348  | 4.49E-38 | 2.62E-36 |
| LTBR     | 14.01458 | 22.91925 | 8.904667 | 1.13E-25 | 6.03E-25 |
| LUC7L3   | 8.084656 | 12.76304 | 4.678381 | 3.48E-08 | 5.94E-08 |
| LYNX1    | 4.68795  | 2.026408 | -2.66154 | 3.50E-26 | 1.96E-25 |
| MAGED1   | 25.38221 | 22.57075 | -2.81146 | 2.90E-12 | 6.25E-12 |
| MAGEF1   | 29.76508 | 18.59953 | -11.1655 | 2.18E-26 | 1.24E-25 |
| MAGEH1   | 23.1117  | 18.13484 | -4.97686 | 1.45E-13 | 3.35E-13 |
| MAGOH    | 12.02667 | 14.03173 | 2.005063 | 1.18E-06 | 1.84E-06 |
| MAL      | 329.7434 | 29.54488 | -300.199 | 1.91E-39 | 2.02E-37 |
| MAN1A1   | 58.70056 | 21.5461  | -37.1545 | 7.66E-38 | 4.05E-36 |
| MAN1C1   | 7.81162  | 1.671384 | -6.14024 | 1.08E-36 | 3.64E-35 |
| MANSC1   | 6.956882 | 4.037623 | -2.91926 | 3.44E-16 | 9.35E-16 |
| MAP1LC3A | 11.74933 | 9.269289 | -2.48004 | 5.91E-12 | 1.25E-11 |
| MAP7     | 14.34124 | 10.45567 | -3.88556 | 1.63E-08 | 2.83E-08 |
| MAP9     | 4.146226 | 1.723186 | -2.42304 | 4.91E-33 | 6.52E-32 |
| MAPK1    | 18.4707  | 20.73861 | 2.26791  | 0.009175 | 0.01103  |
| MAPKAPK2 | 38.73471 | 42.3879  | 3.653191 | 0.002895 | 0.003606 |
| MBOAT2   | 6.588774 | 2.229418 | -4.35936 | 8.02E-36 | 2.01E-34 |
| MCL1     | 98.67727 | 103.4544 | 4.777174 | 0.032594 | 0.03744  |
| MDM2     | 5.168086 | 9.291632 | 4.123546 | 3.24E-26 | 1.82E-25 |
| METTL5   | 6.410306 | 8.543515 | 2.133209 | 6.81E-15 | 1.71E-14 |
| MKNK2    | 20.10473 | 23.71629 | 3.611564 | 0.000776 | 0.001006 |
| MME      | 44.25643 | 13.73022 | -30.5262 | 5.23E-06 | 7.81E-06 |
| MPZL1    | 13.62207 | 18.93768 | 5.315613 | 2.30E-09 | 4.21E-09 |
| MRPL35   | 14.7496  | 9.856476 | -4.89312 | 7.15E-29 | 5.15E-28 |
| MRT04    | 7.670002 | 11.3127  | 3.642702 | 7.57E-24 | 3.47E-23 |
| MSRB2    | 14.13076 | 16.47918 | 2.348421 | 0.002407 | 0.003016 |
| MUC20    | 14.2137  | 9.897796 | -4.31591 | 1.64E-22 | 6.80E-22 |
| MXRA8    | 9.013715 | 21.06606 | 12.05234 | 3.10E-06 | 4.70E-06 |
| MYC      | 12.39718 | 35.53526 | 23.13809 | 3.09E-23 | 1.35E-22 |
| MYLIP    | 15.44444 | 17.75648 | 2.312034 | 0.017372 | 0.020409 |
| MYO1F    | 0.810585 | 4.694882 | 3.884297 | 1.29E-36 | 4.24E-35 |
| NAMPT    | 11.25318 | 15.0026  | 3.749424 | 2.71E-05 | 3.86E-05 |
| NAPA     | 14.99125 | 12.30935 | -2.6819  | 4.54E-18 | 1.38E-17 |
| NAT8B    | 19.28531 | 12.13892 | -7.14638 | 0.004582 | 0.005624 |
| NCF4     | 1.7352   | 7.074388 | 5.339188 | 2.00E-32 | 2.36E-31 |

|         |          |          |          |          |          |
|---------|----------|----------|----------|----------|----------|
| NDRG2   | 33.77022 | 13.21895 | -20.5513 | 7.42E-32 | 7.90E-31 |
| NDUFAF2 | 10.25813 | 12.29903 | 2.040906 | 0.001492 | 0.001899 |
| NDUFS5  | 164.2938 | 212.0821 | 47.78828 | 0.000157 | 0.000212 |
| NFAM1   | 0.668158 | 2.910535 | 2.242377 | 5.15E-34 | 8.26E-33 |
| NFE2L3  | 3.722489 | 9.644068 | 5.921579 | 2.68E-22 | 1.10E-21 |
| NFKB2   | 7.662133 | 17.83473 | 10.1726  | 3.30E-27 | 2.01E-26 |
| NOP58   | 10.08866 | 12.58093 | 2.492267 | 3.42E-09 | 6.18E-09 |
| NPM1    | 90.75706 | 172.8352 | 82.0781  | 9.76E-29 | 6.92E-28 |
| NR1D1   | 9.368591 | 15.82547 | 6.456881 | 4.36E-10 | 8.27E-10 |
| NR3C2   | 11.14804 | 2.762161 | -8.38588 | 1.39E-37 | 6.69E-36 |
| NSA2    | 14.61197 | 21.93084 | 7.318866 | 3.28E-16 | 8.92E-16 |
| NSFL1C  | 11.1629  | 13.17457 | 2.011677 | 3.47E-12 | 7.46E-12 |
| NT5C2   | 7.268386 | 4.148441 | -3.11994 | 8.28E-32 | 8.71E-31 |
| NT5DC1  | 8.556908 | 6.171785 | -2.38512 | 2.57E-22 | 1.05E-21 |
| NT5E    | 6.127113 | 8.40577  | 2.278657 | 0.000192 | 0.000259 |
| NUCB1   | 100.3053 | 109.5047 | 9.199331 | 0.002418 | 0.00303  |
| NUCB2   | 5.382713 | 8.744811 | 3.362098 | 3.74E-26 | 2.09E-25 |
| NUCKS1  | 63.85503 | 51.05014 | -12.8049 | 2.33E-12 | 5.05E-12 |
| NYNRIN  | 6.33999  | 3.384603 | -2.95539 | 4.12E-16 | 1.12E-15 |
| OASL    | 1.068943 | 3.167357 | 2.098414 | 7.52E-24 | 3.45E-23 |
| OAZ2    | 12.70542 | 18.41271 | 5.70729  | 2.04E-20 | 7.30E-20 |
| OCIAD2  | 32.58258 | 46.48493 | 13.90235 | 1.12E-07 | 1.86E-07 |
| OFD1    | 4.667643 | 7.476882 | 2.809238 | 7.87E-17 | 2.22E-16 |
| OPLAH   | 7.592036 | 5.265864 | -2.32617 | 1.18E-13 | 2.75E-13 |
| ORM1    | 0.132599 | 3.962467 | 3.829868 | 0.000614 | 0.000801 |
| ORM2    | 0.076579 | 2.804391 | 2.727812 | 7.94E-13 | 1.77E-12 |
| OSTM1   | 7.772156 | 10.51506 | 2.742907 | 2.73E-11 | 5.55E-11 |
| P2RY13  | 1.040583 | 3.482637 | 2.442055 | 4.61E-23 | 1.99E-22 |
| PABPC1L | 0.912772 | 4.341194 | 3.428421 | 2.18E-16 | 6.00E-16 |
| PACSIN2 | 30.64611 | 24.44486 | -6.20126 | 4.08E-12 | 8.72E-12 |
| PADI2   | 14.23609 | 2.525785 | -11.7103 | 5.58E-29 | 4.07E-28 |
| PAIP2B  | 4.849584 | 2.760319 | -2.08927 | 2.64E-21 | 1.00E-20 |
| PAQR8   | 7.767149 | 3.037197 | -4.72995 | 1.40E-14 | 3.45E-14 |
| PARL    | 19.22027 | 24.4857  | 5.265435 | 8.60E-16 | 2.28E-15 |
| PCYOX1  | 53.52801 | 30.18457 | -23.3434 | 1.14E-31 | 1.17E-30 |
| PDK1    | 1.32196  | 5.05825  | 3.73629  | 7.51E-35 | 1.45E-33 |
| PDLIM7  | 4.96367  | 9.946593 | 4.982923 | 4.24E-18 | 1.29E-17 |
| PEBP1   | 663.8088 | 285.8429 | -377.966 | 9.00E-33 | 1.14E-31 |
| PELI2   | 5.099336 | 2.226575 | -2.87276 | 5.37E-35 | 1.08E-33 |
| PEX7    | 9.371039 | 4.857748 | -4.51329 | 1.67E-33 | 2.42E-32 |
| PFKFB3  | 101.8757 | 41.65926 | -60.2165 | 0.039439 | 0.045011 |
| PFKFB4  | 0.961429 | 5.080214 | 4.118785 | 2.61E-34 | 4.44E-33 |
| PHC2    | 29.97042 | 37.78913 | 7.818712 | 2.43E-09 | 4.43E-09 |
| PHGDH   | 15.55599 | 6.07692  | -9.47907 | 6.45E-26 | 3.53E-25 |



|           |          |          |          |          |          |
|-----------|----------|----------|----------|----------|----------|
| PICALM    | 56.72044 | 53.17849 | -3.54194 | 0.000618 | 0.000806 |
| PILRA     | 2.016723 | 6.333979 | 4.317255 | 5.36E-30 | 4.38E-29 |
| PITPNA    | 24.37523 | 20.75406 | -3.62117 | 2.76E-08 | 4.73E-08 |
| PJA1      | 12.47791 | 7.172888 | -5.30502 | 1.70E-29 | 1.31E-28 |
| PLAGL1    | 1.83617  | 4.418176 | 2.582006 | 2.69E-21 | 1.02E-20 |
| PLAUR     | 1.890215 | 5.432327 | 3.542113 | 2.41E-21 | 9.23E-21 |
| PLCB2     | 0.808865 | 3.622451 | 2.813585 | 4.12E-31 | 3.90E-30 |
| PLEK      | 2.499327 | 12.07706 | 9.577732 | 3.13E-30 | 2.63E-29 |
| PLEKHB1   | 6.765445 | 1.277988 | -5.48746 | 6.65E-36 | 1.70E-34 |
| PLEKHG3   | 7.36281  | 3.651941 | -3.71087 | 1.03E-29 | 8.14E-29 |
| PLOD1     | 22.33062 | 56.13844 | 33.80782 | 2.72E-31 | 2.65E-30 |
| PLXDC1    | 0.793058 | 5.887244 | 5.094186 | 6.26E-38 | 3.43E-36 |
| PMEPA1    | 8.418645 | 25.88378 | 17.46514 | 1.25E-24 | 6.15E-24 |
| POLR1E    | 5.065133 | 8.677656 | 3.612522 | 1.46E-23 | 6.56E-23 |
| POLR2K    | 25.27023 | 20.83111 | -4.43912 | 1.89E-13 | 4.35E-13 |
| PPA2      | 15.587   | 9.130783 | -6.45622 | 3.13E-30 | 2.63E-29 |
| PPIL1     | 16.2632  | 10.06174 | -6.20146 | 1.93E-21 | 7.42E-21 |
| PPIL4     | 12.27073 | 9.597034 | -2.6737  | 6.84E-11 | 1.36E-10 |
| PPM1F     | 3.499927 | 7.319641 | 3.819714 | 2.33E-27 | 1.43E-26 |
| PPM1K     | 5.446468 | 1.921653 | -3.52482 | 2.00E-36 | 6.04E-35 |
| PPP1R15A  | 22.13926 | 34.79714 | 12.65788 | 2.06E-09 | 3.77E-09 |
| PPP1R2    | 12.74418 | 10.02426 | -2.71992 | 1.56E-15 | 4.07E-15 |
| PPP1R3B   | 8.881541 | 22.10896 | 13.22742 | 4.54E-28 | 3.00E-27 |
| PPP2R5A   | 24.014   | 16.40408 | -7.60993 | 1.64E-23 | 7.33E-23 |
| PPT1      | 48.14141 | 62.85246 | 14.71105 | 2.21E-12 | 4.81E-12 |
| PREPL     | 17.25681 | 11.02517 | -6.23164 | 6.34E-23 | 2.72E-22 |
| PRF1      | 1.67741  | 10.78212 | 9.104709 | 6.58E-35 | 1.29E-33 |
| PRKAR1A   | 64.59667 | 45.18233 | -19.4143 | 2.32E-24 | 1.11E-23 |
| PRKCA     | 8.382534 | 3.659702 | -4.72283 | 9.88E-32 | 1.03E-30 |
| PRPS2     | 27.31549 | 13.70809 | -13.6074 | 5.37E-35 | 1.08E-33 |
| PRR13     | 49.40799 | 35.76712 | -13.6409 | 2.49E-20 | 8.83E-20 |
| PSAT1     | 44.95857 | 7.969221 | -36.9893 | 4.15E-24 | 1.94E-23 |
| PSMA3     | 16.75632 | 18.92425 | 2.167929 | 0.000304 | 0.000404 |
| PSMD8     | 36.71859 | 40.74306 | 4.024471 | 4.93E-05 | 6.90E-05 |
| PTGS2     | 5.727144 | 2.505845 | -3.2213  | 2.04E-14 | 4.97E-14 |
| PTMA      | 165.6641 | 183.5953 | 17.93123 | 0.008283 | 0.009989 |
| PTP4A3    | 5.701082 | 20.87827 | 15.17718 | 2.77E-34 | 4.68E-33 |
| PTPRJ     | 11.41952 | 7.796345 | -3.62317 | 1.45E-17 | 4.28E-17 |
| PTPRK     | 9.284379 | 12.52408 | 3.239698 | 1.07E-07 | 1.76E-07 |
| PYGL      | 3.956743 | 16.08836 | 12.13162 | 1.28E-35 | 3.01E-34 |
| RAB11FIP1 | 6.947673 | 3.553344 | -3.39433 | 8.82E-24 | 4.02E-23 |
| RAB11FIP2 | 9.235496 | 5.259293 | -3.9762  | 5.75E-27 | 3.43E-26 |
| RAB20     | 17.10694 | 22.42549 | 5.318547 | 3.80E-08 | 6.47E-08 |
| RAB24     | 2.272892 | 7.245195 | 4.972303 | 5.39E-33 | 7.12E-32 |

|          |          |          |          |          |          |
|----------|----------|----------|----------|----------|----------|
| RAB5B    | 36.24847 | 27.84433 | -8.40415 | 3.53E-29 | 2.63E-28 |
| RAB5C    | 48.10345 | 33.65143 | -14.452  | 2.46E-31 | 2.41E-30 |
| RABL3    | 8.465092 | 6.084938 | -2.38015 | 9.51E-22 | 3.73E-21 |
| RALA     | 12.02218 | 15.39966 | 3.37748  | 3.66E-09 | 6.61E-09 |
| RALB     | 32.5389  | 41.65778 | 9.118883 | 7.25E-12 | 1.53E-11 |
| RALBP1   | 39.63921 | 14.36988 | -25.2693 | 2.29E-38 | 1.49E-36 |
| RARA     | 7.262339 | 15.19484 | 7.932501 | 8.71E-27 | 5.11E-26 |
| RARS     | 14.34752 | 19.75122 | 5.403708 | 4.96E-15 | 1.26E-14 |
| RASGRP3  | 2.125646 | 4.549844 | 2.424198 | 1.03E-25 | 5.53E-25 |
| RCN3     | 4.469269 | 12.36702 | 7.89775  | 5.89E-19 | 1.90E-18 |
| RERE     | 17.81663 | 15.20526 | -2.61137 | 3.35E-06 | 5.06E-06 |
| RGS14    | 4.573026 | 11.91387 | 7.340848 | 6.75E-26 | 3.69E-25 |
| RHCG     | 62.55006 | 20.79701 | -41.753  | 1.13E-36 | 3.78E-35 |
| RHOB     | 189.4796 | 354.0616 | 164.582  | 1.51E-09 | 2.78E-09 |
| RHOBTB1  | 10.63234 | 17.21264 | 6.580297 | 1.22E-08 | 2.13E-08 |
| RHOG     | 15.55436 | 30.87613 | 15.32177 | 9.16E-32 | 9.60E-31 |
| RMND5A   | 14.1932  | 10.34774 | -3.84545 | 2.55E-17 | 7.41E-17 |
| RNASE6   | 6.939145 | 20.28706 | 13.34791 | 2.05E-24 | 9.83E-24 |
| RNF166   | 2.037513 | 5.059567 | 3.022054 | 9.34E-36 | 2.30E-34 |
| RNF213   | 7.567684 | 11.51647 | 3.948784 | 1.72E-13 | 3.99E-13 |
| RPL14    | 35.80054 | 43.76213 | 7.961583 | 0.000517 | 0.000677 |
| RPL21    | 82.26761 | 97.51578 | 15.24817 | 0.001559 | 0.001981 |
| RPL3     | 318.5294 | 459.7664 | 141.237  | 3.64E-20 | 1.28E-19 |
| RPS23    | 93.3741  | 142.5272 | 49.1531  | 2.94E-21 | 1.11E-20 |
| RPS25    | 208.1666 | 338.7037 | 130.5371 | 1.03E-25 | 5.53E-25 |
| RPS5     | 75.91488 | 147.6936 | 71.77869 | 1.69E-28 | 1.17E-27 |
| RPS6KA1  | 11.08876 | 8.493725 | -2.59504 | 9.06E-15 | 2.26E-14 |
| RTN3     | 42.7168  | 28.46734 | -14.2495 | 2.00E-12 | 4.35E-12 |
| RTN4IP1  | 6.136077 | 3.478412 | -2.65766 | 1.06E-28 | 7.47E-28 |
| RYBP     | 9.741331 | 7.724015 | -2.01732 | 2.05E-12 | 4.46E-12 |
| S100A11  | 287.5913 | 426.0247 | 138.4334 | 7.09E-07 | 1.12E-06 |
| SALL2    | 4.833035 | 2.675167 | -2.15787 | 2.30E-16 | 6.32E-16 |
| SBDS     | 67.40811 | 59.62881 | -7.7793  | 4.84E-06 | 7.24E-06 |
| SBNO2    | 5.164889 | 10.42105 | 5.256161 | 3.89E-24 | 1.83E-23 |
| SCRN2    | 18.49594 | 12.86885 | -5.62709 | 0.000194 | 0.000261 |
| SEC62    | 35.19682 | 27.9721  | -7.22472 | 8.01E-17 | 2.26E-16 |
| SEMA3B   | 11.76149 | 4.609254 | -7.15223 | 1.93E-28 | 1.33E-27 |
| SEPHS1   | 19.39759 | 13.20869 | -6.1889  | 4.29E-32 | 4.75E-31 |
| 5-Sep    | 1.023569 | 3.399166 | 2.375597 | 2.08E-28 | 1.42E-27 |
| 6-Sep    | 9.533079 | 6.418354 | -3.11472 | 1.44E-16 | 4.00E-16 |
| SERPINE1 | 26.71965 | 121.9353 | 95.21566 | 1.69E-15 | 4.40E-15 |
| SERPING1 | 114.368  | 176.6233 | 62.2553  | 5.60E-06 | 8.34E-06 |
| SESN2    | 11.20349 | 7.653883 | -3.54961 | 1.40E-08 | 2.45E-08 |
| SETBP1   | 5.606583 | 2.984985 | -2.6216  | 4.04E-26 | 2.25E-25 |

|          |          |          |          |          |          |
|----------|----------|----------|----------|----------|----------|
| SFXN2    | 9.008744 | 1.860068 | -7.14868 | 1.03E-30 | 9.23E-30 |
| SGPL1    | 15.58231 | 11.60406 | -3.97825 | 4.01E-11 | 8.08E-11 |
| SH3BP2   | 4.034804 | 13.43978 | 9.404979 | 1.37E-34 | 2.48E-33 |
| SH3PXD2A | 3.185817 | 6.302985 | 3.117168 | 4.35E-20 | 1.52E-19 |
| SH3YL1   | 9.136237 | 5.974206 | -3.16203 | 4.84E-12 | 1.03E-11 |
| SHISA5   | 26.67117 | 34.27096 | 7.599788 | 4.93E-13 | 1.11E-12 |
| SHKBP1   | 10.60571 | 13.04182 | 2.436109 | 2.59E-10 | 4.98E-10 |
| SHMT1    | 42.60595 | 21.60541 | -21.0005 | 1.87E-15 | 4.87E-15 |
| SHROOM1  | 1.991107 | 4.35139  | 2.360283 | 4.94E-24 | 2.30E-23 |
| SIPA1L2  | 3.187093 | 7.282658 | 4.095565 | 4.73E-24 | 2.20E-23 |
| SIRT2    | 7.622034 | 10.85283 | 3.230792 | 2.04E-29 | 1.56E-28 |
| SLA      | 1.537339 | 5.43405  | 3.89671  | 3.15E-27 | 1.92E-26 |
| SLC15A3  | 2.414404 | 7.561035 | 5.146631 | 2.07E-32 | 2.43E-31 |
| SLC20A2  | 12.20491 | 4.655861 | -7.54905 | 1.44E-38 | 9.90E-37 |
| SLC22A4  | 2.625763 | 5.739698 | 3.113935 | 3.96E-12 | 8.47E-12 |
| SLC25A37 | 3.379612 | 6.881192 | 3.50158  | 3.24E-17 | 9.33E-17 |
| SLC2A3   | 5.57061  | 22.79552 | 17.22491 | 1.51E-26 | 8.71E-26 |
| SLC35E1  | 10.22401 | 13.26472 | 3.040706 | 8.01E-12 | 1.69E-11 |
| SLC38A1  | 21.18177 | 31.95883 | 10.77706 | 7.17E-10 | 1.34E-09 |
| SLC43A2  | 18.68026 | 8.808726 | -9.87154 | 9.68E-29 | 6.88E-28 |
| SLC45A4  | 7.470025 | 4.534874 | -2.93515 | 3.11E-16 | 8.47E-16 |
| SLC5A12  | 37.13158 | 13.53986 | -23.5917 | 0.000412 | 0.000543 |
| SLC6A12  | 24.7042  | 10.77734 | -13.9269 | 4.05E-06 | 6.10E-06 |
| SLC8A1   | 4.233672 | 1.735051 | -2.49862 | 1.47E-06 | 2.28E-06 |
| SMAP2    | 9.756515 | 17.81345 | 8.056935 | 1.02E-23 | 4.63E-23 |
| SMARCB1  | 24.05643 | 26.55214 | 2.49571  | 7.77E-06 | 1.15E-05 |
| SNN      | 16.08875 | 10.73885 | -5.3499  | 3.35E-21 | 1.26E-20 |
| SNRPA1   | 3.400277 | 5.553816 | 2.153539 | 1.92E-25 | 1.01E-24 |
| SNRPF    | 6.077471 | 8.656414 | 2.578944 | 5.30E-15 | 1.34E-14 |
| SNX29    | 10.98676 | 8.788443 | -2.19831 | 6.07E-07 | 9.61E-07 |
| SOD2     | 39.52758 | 90.10934 | 50.58176 | 4.61E-15 | 1.17E-14 |
| SP1      | 16.37865 | 19.51217 | 3.133517 | 6.05E-07 | 9.58E-07 |
| SP2      | 10.56333 | 8.318083 | -2.24524 | 7.46E-10 | 1.40E-09 |
| SREBF1   | 7.018727 | 13.00983 | 5.991103 | 3.24E-17 | 9.33E-17 |
| ST3GAL4  | 15.43632 | 6.453408 | -8.98291 | 7.10E-25 | 3.55E-24 |
| ST6GAL1  | 62.3045  | 13.36921 | -48.9353 | 5.32E-37 | 2.03E-35 |
| STAP1    | 9.677988 | 6.034139 | -3.64385 | 1.42E-35 | 3.30E-34 |
| STARD10  | 11.00915 | 8.52213  | -2.48702 | 3.25E-12 | 7.00E-12 |
| STAT3    | 35.12461 | 27.74807 | -7.37654 | 8.41E-09 | 1.49E-08 |
| STMN3    | 7.10587  | 31.17911 | 24.07324 | 1.23E-29 | 9.67E-29 |
| SUSD3    | 10.6412  | 5.676373 | -4.96483 | 4.81E-07 | 7.66E-07 |
| SWAP70   | 11.82899 | 13.99422 | 2.165231 | 0.002143 | 0.002695 |
| SYNJ2BP  | 16.61969 | 7.14131  | -9.47838 | 8.85E-37 | 3.14E-35 |
| SYTL3    | 2.178596 | 5.022064 | 2.843468 | 1.37E-21 | 5.32E-21 |

|          |          |          |          |          |          |
|----------|----------|----------|----------|----------|----------|
| TAGLN2   | 105.3737 | 195.0582 | 89.68451 | 1.03E-23 | 4.66E-23 |
| TCEA3    | 22.83494 | 38.91835 | 16.08341 | 3.19E-15 | 8.16E-15 |
| TCEAL3   | 13.4679  | 7.836171 | -5.63173 | 2.22E-22 | 9.12E-22 |
| TCEAL4   | 36.84638 | 34.30908 | -2.5373  | 0.003183 | 0.003955 |
| TCERG1   | 2.762257 | 5.396405 | 2.634148 | 2.83E-26 | 1.60E-25 |
| TCN2     | 47.27309 | 69.03048 | 21.75739 | 1.49E-05 | 2.16E-05 |
| TEF      | 17.08668 | 10.90065 | -6.18603 | 1.04E-11 | 2.16E-11 |
| TFE3     | 14.9441  | 16.94884 | 2.004735 | 6.45E-06 | 9.57E-06 |
| TGFB1    | 14.84169 | 43.80108 | 28.95939 | 8.28E-32 | 8.71E-31 |
| THEM4    | 6.683804 | 4.162128 | -2.52168 | 8.67E-30 | 6.89E-29 |
| THRAP3   | 33.09527 | 27.97191 | -5.12336 | 1.98E-08 | 3.43E-08 |
| TLE2     | 7.410316 | 4.236705 | -3.17361 | 2.46E-19 | 8.14E-19 |
| TLR4     | 5.908661 | 8.094908 | 2.186246 | 0.00018  | 0.000244 |
| TLR5     | 4.34232  | 1.913259 | -2.42906 | 1.39E-20 | 5.02E-20 |
| TMC4     | 26.97229 | 6.029732 | -20.9426 | 1.48E-32 | 1.80E-31 |
| TMCC3    | 6.080406 | 9.102006 | 3.021599 | 2.11E-05 | 3.04E-05 |
| TMEM116  | 4.406298 | 1.873106 | -2.53319 | 9.00E-33 | 1.14E-31 |
| TMEM127  | 27.71796 | 23.97509 | -3.74286 | 3.09E-06 | 4.69E-06 |
| TMEM140  | 19.64592 | 52.58952 | 32.9436  | 5.76E-35 | 1.14E-33 |
| TMEM164  | 11.35632 | 4.0233   | -7.33302 | 1.44E-39 | 1.66E-37 |
| TMEM177  | 6.2709   | 3.508558 | -2.76234 | 1.40E-25 | 7.44E-25 |
| TMEM204  | 17.61685 | 34.6895  | 17.07265 | 8.22E-13 | 1.83E-12 |
| TMEM25   | 7.513849 | 3.245368 | -4.26848 | 2.29E-35 | 5.03E-34 |
| TMEM45B  | 18.58362 | 1.202243 | -17.3814 | 1.09E-41 | 6.17E-39 |
| TMEM8B   | 6.693157 | 3.925896 | -2.76726 | 1.22E-25 | 6.53E-25 |
| TNFAIP6  | 0.569658 | 35.32574 | 34.75608 | 5.81E-38 | 3.25E-36 |
| TNFRSF1A | 22.37753 | 43.55892 | 21.18138 | 3.59E-27 | 2.18E-26 |
| TNFSF10  | 51.96373 | 83.75021 | 31.78648 | 3.53E-08 | 6.03E-08 |
| TOMM20   | 71.08871 | 84.78803 | 13.69932 | 0.000543 | 0.000711 |
| TOMM7    | 63.69615 | 84.25252 | 20.55637 | 6.55E-11 | 1.30E-10 |
| TOP1     | 30.4174  | 25.50933 | -4.90807 | 4.74E-11 | 9.51E-11 |
| TP53I11  | 9.189451 | 19.54064 | 10.35119 | 6.23E-18 | 1.88E-17 |
| TP53INP2 | 28.93769 | 26.60308 | -2.33461 | 0.029651 | 0.034183 |
| TPCN2    | 3.02999  | 5.432791 | 2.402801 | 1.17E-19 | 3.97E-19 |
| TPST1    | 11.22283 | 7.297364 | -3.92546 | 9.72E-14 | 2.28E-13 |
| TRAFD1   | 8.540211 | 11.4366  | 2.896385 | 4.56E-11 | 9.16E-11 |
| TRIB1    | 25.07911 | 12.34637 | -12.7327 | 2.69E-21 | 1.02E-20 |
| TRIM2    | 26.69296 | 7.629952 | -19.063  | 2.29E-35 | 5.03E-34 |
| TSC22D3  | 35.17361 | 78.12439 | 42.95078 | 2.71E-13 | 6.20E-13 |
| TSPAN18  | 8.240334 | 21.2083  | 12.96797 | 4.21E-21 | 1.58E-20 |
| TSPAN2   | 4.803767 | 2.782835 | -2.02093 | 9.56E-11 | 1.89E-10 |
| TSPAN3   | 31.09242 | 22.99178 | -8.10064 | 7.97E-24 | 3.64E-23 |
| TSPAN4   | 7.397577 | 17.02768 | 9.630099 | 6.56E-33 | 8.49E-32 |
| TSPYL5   | 12.62531 | 4.062507 | -8.5628  | 2.32E-31 | 2.28E-30 |

|         |          |          |          |          |          |
|---------|----------|----------|----------|----------|----------|
| TSR1    | 6.515464 | 8.605946 | 2.090482 | 2.78E-14 | 6.73E-14 |
| TTC3    | 13.34455 | 10.83521 | -2.50935 | 6.65E-11 | 1.32E-10 |
| TUBB6   | 7.763665 | 17.16057 | 9.396904 | 9.14E-24 | 4.16E-23 |
| TYK2    | 6.574982 | 12.08838 | 5.513396 | 8.57E-35 | 1.63E-33 |
| UBA5    | 7.010193 | 11.85592 | 4.845731 | 9.83E-16 | 2.60E-15 |
| UBE2B   | 17.65181 | 23.00619 | 5.354383 | 4.93E-13 | 1.11E-12 |
| UBE2C   | 0.82244  | 6.0132   | 5.19076  | 7.78E-35 | 1.49E-33 |
| UBL7    | 21.00145 | 18.00526 | -2.99619 | 3.15E-09 | 5.70E-09 |
| UBTD1   | 15.16429 | 7.645875 | -7.51842 | 9.03E-17 | 2.54E-16 |
| ULK1    | 5.83063  | 8.562715 | 2.732086 | 1.17E-09 | 2.16E-09 |
| UPP1    | 4.363011 | 8.78688  | 4.423868 | 1.52E-15 | 3.98E-15 |
| USP4    | 9.706623 | 7.433581 | -2.27304 | 3.64E-20 | 1.28E-19 |
| VSIG4   | 5.905771 | 18.19611 | 12.29034 | 1.08E-16 | 3.02E-16 |
| WAS     | 1.768378 | 8.080171 | 6.311793 | 4.20E-33 | 5.66E-32 |
| WDR75   | 4.886879 | 6.903378 | 2.016499 | 3.16E-22 | 1.29E-21 |
| WWP1    | 16.76376 | 12.38107 | -4.38269 | 1.55E-19 | 5.22E-19 |
| XPA     | 9.851556 | 6.495154 | -3.3564  | 2.62E-21 | 9.98E-21 |
| ZBTB7B  | 8.833117 | 12.33598 | 3.502865 | 5.05E-19 | 1.64E-18 |
| ZCCHC17 | 16.51391 | 14.12851 | -2.3854  | 3.93E-10 | 7.46E-10 |
| ZDHHC18 | 3.164853 | 5.289142 | 2.124289 | 1.07E-30 | 9.53E-30 |
| ZDHHC3  | 13.64501 | 6.803601 | -6.84141 | 3.11E-33 | 4.27E-32 |
| ZER1    | 21.46157 | 14.37862 | -7.08296 | 8.53E-31 | 7.71E-30 |
| ZFAND3  | 28.48906 | 22.07736 | -6.4117  | 4.76E-21 | 1.77E-20 |
| ZFYVE1  | 8.063127 | 5.994756 | -2.06837 | 3.36E-18 | 1.03E-17 |
| ZFYVE9  | 8.966858 | 5.240273 | -3.72658 | 1.54E-30 | 1.35E-29 |
| ZMAT1   | 1.833548 | 4.17636  | 2.342811 | 1.42E-11 | 2.94E-11 |
| ZNF395  | 9.711918 | 61.92088 | 52.20896 | 9.34E-36 | 2.30E-34 |
| ZNF787  | 3.904393 | 6.034328 | 2.129935 | 4.74E-19 | 1.54E-18 |

---
