# Supplementary material for: Effects and Prognostic Values of Circadian Genes CSNK1E/GNA11/KLF9/THRAP3 in Kidney Renal Clear Cell Carcinoma via a Comprehensive Analysis
Source: MDPI journal article supplement (doi:10.3390/bioengineering9070306), 2022-07-11
Supplement: s1 [file s1]

**Supplementary Table.S5****The clinical data of KIRC patients**

| Id           | futime | fustat | age | gender | grade | stage   | T   | M  |
|--------------|--------|--------|-----|--------|-------|---------|-----|----|
| TCGA-EU-5904 | 551    | 0      | 47  | FEMALE | G1    | Stage I | T1  | M0 |
| TCGA-B4-5834 | 38     | 0      | 59  | MALE   | G1    | Stage I | T1  | M0 |
| TCGA-CZ-4859 | 1787   | 0      | 59  | FEMALE | G2    | Stage I | T1  | M0 |
| TCGA-B4-5835 | 16     | 0      | 64  | FEMALE | G2    | Stage I | T1  | M0 |
| TCGA-B0-5705 | 3668   | 0      | 65  | FEMALE | G2    | Stage I | T1  | M0 |
| TCGA-A3-3331 | 1257   | 0      | 86  | FEMALE | G2    | Stage I | T1  | M0 |
| TCGA-B0-5104 | 0      | 1      | 90  | FEMALE | G2    | Stage I | T1  | M0 |
| TCGA-B4-5843 | 11     | 0      | 45  | MALE   | G2    | Stage I | T1  | M0 |
| TCGA-A3-3383 | 861    | 0      | 52  | MALE   | G2    | Stage I | T1  | M0 |
| TCGA-B0-5699 | 2741   | 0      | 53  | MALE   | G2    | Stage I | T1  | M0 |
| TCGA-A3-3380 | 567    | 0      | 54  | MALE   | G2    | Stage I | T1  | M0 |
| TCGA-A3-3311 | 1191   | 1      | 57  | MALE   | G2    | Stage I | T1  | M0 |
| TCGA-BP-4353 | 375    | 1      | 61  | MALE   | G2    | Stage I | T1  | M0 |
| TCGA-B4-5378 | 175    | 0      | 62  | MALE   | G2    | Stage I | T1  | M0 |
| TCGA-AK-3425 | 3343   | 0      | 68  | MALE   | G2    | Stage I | T1  | M0 |
| TCGA-B0-5098 | 1584   | 1      | 53  | FEMALE | G3    | Stage I | T1  | M0 |
| TCGA-EU-5905 | 119    | 0      | 67  | FEMALE | G3    | Stage I | T1  | M0 |
| TCGA-B0-5102 | 2764   | 1      | 74  | FEMALE | G3    | Stage I | T1  | M0 |
| TCGA-CZ-4866 | 1768   | 0      | 79  | FEMALE | G3    | Stage I | T1  | M0 |
| TCGA-A3-3378 | 630    | 0      | 60  | MALE   | G3    | Stage I | T1  | M0 |
| TCGA-CZ-5986 | 373    | 0      | 61  | MALE   | G3    | Stage I | T1  | M0 |
| TCGA-A3-3336 | 1043   | 0      | 75  | FEMALE | G4    | Stage I | T1  | M0 |
| TCGA-AS-3778 | 43     | 0      | 35  | MALE   | G1    | Stage I | T1a | M0 |
| TCGA-A3-3326 | 1137   | 0      | 47  | MALE   | G1    | Stage I | T1a | M0 |
| TCGA-CW-6093 | 3146   | 0      | 73  | MALE   | G1    | Stage I | T1a | M0 |
| TCGA-DV-5569 | 355    | 0      | 29  | FEMALE | G2    | Stage I | T1a | M0 |
| TCGA-DV-5567 | 910    | 0      | 40  | FEMALE | G2    | Stage I | T1a | M0 |
| TCGA-CW-6096 | 2701   | 0      | 44  | FEMALE | G2    | Stage I | T1a | M0 |
| TCGA-BP-5174 | 2257   | 0      | 45  | FEMALE | G2    | Stage I | T1a | M0 |
| TCGA-A3-3385 | 1993   | 0      | 46  | FEMALE | G2    | Stage I | T1a | M0 |
| TCGA-BP-5186 | 693    | 0      | 50  | FEMALE | G2    | Stage I | T1a | M0 |
| TCGA-CW-5583 | 2489   | 0      | 51  | FEMALE | G2    | Stage I | T1a | M0 |
| TCGA-DV-5575 | 1006   | 0      | 52  | FEMALE | G2    | Stage I | T1a | M0 |
| TCGA-BP-4964 | 1862   | 0      | 54  | FEMALE | G2    | Stage I | T1a | M0 |
| TCGA-BP-4782 | 354    | 0      | 55  | FEMALE | G2    | Stage I | T1a | M0 |
| TCGA-BP-4775 | 1843   | 0      | 55  | FEMALE | G2    | Stage I | T1a | M0 |
| TCGA-DV-5576 | 727    | 1      | 55  | FEMALE | G2    | Stage I | T1a | M0 |
| TCGA-A3-3358 | 1307   | 0      | 57  | FEMALE | G2    | Stage I | T1a | M0 |
| TCGA-BP-4774 | 1885   | 0      | 57  | FEMALE | G2    | Stage I | T1a | M0 |
| TCGA-CZ-5982 | 2042   | 0      | 59  | FEMALE | G2    | Stage I | T1a | M0 |
| TCGA-A3-3362 | 1559   | 0      | 60  | FEMALE | G2    | Stage I | T1a | M0 |

|              |      |   |    |        |    |         |     |    |
|--------------|------|---|----|--------|----|---------|-----|----|
| TCGA-CJ-4905 | 1496 | 0 | 62 | FEMALE | G2 | Stage I | T1a | M0 |
| TCGA-BP-4969 | 1794 | 0 | 63 | FEMALE | G2 | Stage I | T1a | M0 |
| TCGA-DV-5566 | 1398 | 0 | 67 | FEMALE | G2 | Stage I | T1a | M0 |
| TCGA-BP-4784 | 1854 | 0 | 67 | FEMALE | G2 | Stage I | T1a | M0 |
| TCGA-BP-4349 | 372  | 0 | 68 | FEMALE | G2 | Stage I | T1a | M0 |
| TCGA-CZ-4865 | 166  | 1 | 70 | FEMALE | G2 | Stage I | T1a | M0 |
| TCGA-B0-5110 | 1092 | 0 | 71 | FEMALE | G2 | Stage I | T1a | M0 |
| TCGA-BP-4768 | 400  | 0 | 72 | FEMALE | G2 | Stage I | T1a | M0 |
| TCGA-B0-5120 | 493  | 0 | 72 | FEMALE | G2 | Stage I | T1a | M0 |
| TCGA-B8-4154 | 255  | 0 | 73 | FEMALE | G2 | Stage I | T1a | M0 |
| TCGA-BP-4795 | 620  | 0 | 74 | FEMALE | G2 | Stage I | T1a | M0 |
| TCGA-BP-4344 | 1666 | 0 | 75 | FEMALE | G2 | Stage I | T1a | M0 |
| TCGA-B0-4945 | 2145 | 1 | 75 | FEMALE | G2 | Stage I | T1a | M0 |
| TCGA-CW-5588 | 2017 | 0 | 78 | FEMALE | G2 | Stage I | T1a | M0 |
| TCGA-BP-5176 | 1590 | 1 | 78 | FEMALE | G2 | Stage I | T1a | M0 |
| TCGA-BP-4763 | 1270 | 1 | 79 | FEMALE | G2 | Stage I | T1a | M0 |
| TCGA-A3-3359 | 2504 | 0 | 82 | FEMALE | G2 | Stage I | T1a | M0 |
| TCGA-AK-3450 | 1508 | 0 | 85 | FEMALE | G2 | Stage I | T1a | M0 |
| TCGA-DV-5568 | 370  | 0 | 26 | MALE   | G2 | Stage I | T1a | M0 |
| TCGA-DV-5574 | 723  | 0 | 37 | MALE   | G2 | Stage I | T1a | M0 |
| TCGA-CJ-4908 | 1531 | 0 | 38 | MALE   | G2 | Stage I | T1a | M0 |
| TCGA-BP-5194 | 408  | 0 | 39 | MALE   | G2 | Stage I | T1a | M0 |
| TCGA-BP-4758 | 2208 | 0 | 40 | MALE   | G2 | Stage I | T1a | M0 |
| TCGA-DV-5573 | 1130 | 0 | 41 | MALE   | G2 | Stage I | T1a | M0 |
| TCGA-B8-5545 | 522  | 0 | 42 | MALE   | G2 | Stage I | T1a | M0 |
| TCGA-B8-5165 | 8    | 0 | 43 | MALE   | G2 | Stage I | T1a | M0 |
| TCGA-BP-4765 | 2184 | 0 | 43 | MALE   | G2 | Stage I | T1a | M0 |
| TCGA-A3-3365 | 873  | 0 | 46 | MALE   | G2 | Stage I | T1a | M0 |
| TCGA-BP-5008 | 1071 | 0 | 46 | MALE   | G2 | Stage I | T1a | M0 |
| TCGA-BP-4965 | 1871 | 0 | 46 | MALE   | G2 | Stage I | T1a | M0 |
| TCGA-BP-4961 | 1935 | 0 | 47 | MALE   | G2 | Stage I | T1a | M0 |
| TCGA-BP-4789 | 1489 | 0 | 48 | MALE   | G2 | Stage I | T1a | M0 |
| TCGA-A3-3387 | 617  | 0 | 49 | MALE   | G2 | Stage I | T1a | M0 |
| TCGA-B0-5697 | 1835 | 0 | 50 | MALE   | G2 | Stage I | T1a | M0 |
| TCGA-BP-4759 | 2372 | 0 | 50 | MALE   | G2 | Stage I | T1a | M0 |
| TCGA-A3-3322 | 1478 | 0 | 51 | MALE   | G2 | Stage I | T1a | M0 |
| TCGA-A3-3376 | 1696 | 1 | 51 | MALE   | G2 | Stage I | T1a | M0 |
| TCGA-BP-4776 | 411  | 0 | 52 | MALE   | G2 | Stage I | T1a | M0 |
| TCGA-CW-5589 | 2378 | 0 | 52 | MALE   | G2 | Stage I | T1a | M0 |
| TCGA-A3-3325 | 1170 | 1 | 52 | MALE   | G2 | Stage I | T1a | M0 |
| TCGA-BP-4331 | 2454 | 1 | 52 | MALE   | G2 | Stage I | T1a | M0 |
| TCGA-BP-5196 | 1018 | 0 | 53 | MALE   | G2 | Stage I | T1a | M0 |
| TCGA-BP-5180 | 2263 | 0 | 53 | MALE   | G2 | Stage I | T1a | M0 |
| TCGA-BP-5187 | 406  | 0 | 54 | MALE   | G2 | Stage I | T1a | M0 |

|              |      |   |    |        |    |         |     |    |
|--------------|------|---|----|--------|----|---------|-----|----|
| TCGA-BP-4991 | 1413 | 0 | 54 | MALE   | G2 | Stage I | T1a | M0 |
| TCGA-BP-5170 | 2412 | 0 | 55 | MALE   | G2 | Stage I | T1a | M0 |
| TCGA-BP-4999 | 1266 | 0 | 56 | MALE   | G2 | Stage I | T1a | M0 |
| TCGA-BP-4801 | 1124 | 0 | 57 | MALE   | G2 | Stage I | T1a | M0 |
| TCGA-B8-4619 | 19   | 0 | 58 | MALE   | G2 | Stage I | T1a | M0 |
| TCGA-AK-3460 | 951  | 0 | 58 | MALE   | G2 | Stage I | T1a | M0 |
| TCGA-BP-5192 | 714  | 0 | 59 | MALE   | G2 | Stage I | T1a | M0 |
| TCGA-DV-5565 | 1329 | 0 | 59 | MALE   | G2 | Stage I | T1a | M0 |
| TCGA-BP-5006 | 840  | 0 | 61 | MALE   | G2 | Stage I | T1a | M0 |
| TCGA-BP-4769 | 1876 | 0 | 63 | MALE   | G2 | Stage I | T1a | M0 |
| TCGA-B0-5106 | 1598 | 1 | 64 | MALE   | G2 | Stage I | T1a | M0 |
| TCGA-BP-4177 | 1670 | 0 | 65 | MALE   | G2 | Stage I | T1a | M0 |
| TCGA-3Z-A93Z | 385  | 0 | 69 | MALE   | G2 | Stage I | T1a | M0 |
| TCGA-BP-4760 | 2361 | 0 | 69 | MALE   | G2 | Stage I | T1a | M0 |
| TCGA-AK-3461 | 853  | 0 | 72 | MALE   | G2 | Stage I | T1a | M0 |
| TCGA-BP-4988 | 828  | 1 | 72 | MALE   | G2 | Stage I | T1a | M0 |
| TCGA-B2-5635 | 315  | 0 | 74 | MALE   | G2 | Stage I | T1a | M0 |
| TCGA-BP-5195 | 749  | 0 | 75 | MALE   | G2 | Stage I | T1a | M0 |
| TCGA-BP-5173 | 62   | 1 | 75 | MALE   | G2 | Stage I | T1a | M0 |
| TCGA-BP-5168 | 1463 | 1 | 75 | MALE   | G2 | Stage I | T1a | M0 |
| TCGA-BP-4790 | 1111 | 1 | 76 | MALE   | G2 | Stage I | T1a | M0 |
| TCGA-B0-5700 | 1082 | 0 | 77 | MALE   | G2 | Stage I | T1a | M0 |
| TCGA-B2-5636 | 265  | 0 | 79 | MALE   | G2 | Stage I | T1a | M0 |
| TCGA-CZ-4853 | 774  | 0 | 82 | MALE   | G2 | Stage I | T1a | M0 |
| TCGA-B0-4823 | 454  | 1 | 88 | MALE   | G2 | Stage I | T1a | M0 |
| TCGA-B0-5707 | 2828 | 0 | 39 | FEMALE | G3 | Stage I | T1a | M0 |
| TCGA-CJ-4886 | 1952 | 0 | 42 | FEMALE | G3 | Stage I | T1a | M0 |
| TCGA-BP-4766 | 1462 | 0 | 43 | FEMALE | G3 | Stage I | T1a | M0 |
| TCGA-BP-5177 | 293  | 0 | 46 | FEMALE | G3 | Stage I | T1a | M0 |
| TCGA-B0-4824 | 1657 | 1 | 49 | FEMALE | G3 | Stage I | T1a | M0 |
| TCGA-B8-5159 | 240  | 0 | 61 | FEMALE | G3 | Stage I | T1a | M0 |
| TCGA-B8-4148 | 379  | 0 | 63 | FEMALE | G3 | Stage I | T1a | M0 |
| TCGA-B0-5691 | 3431 | 0 | 66 | FEMALE | G3 | Stage I | T1a | M0 |
| TCGA-BP-4807 | 211  | 0 | 42 | MALE   | G3 | Stage I | T1a | M0 |
| TCGA-BP-4762 | 1343 | 1 | 42 | MALE   | G3 | Stage I | T1a | M0 |
| TCGA-BP-4777 | 1731 | 0 | 46 | MALE   | G3 | Stage I | T1a | M0 |
| TCGA-BP-4998 | 932  | 0 | 49 | MALE   | G3 | Stage I | T1a | M0 |
| TCGA-B0-4834 | 2090 | 1 | 49 | MALE   | G3 | Stage I | T1a | M0 |
| TCGA-CJ-5671 | 1943 | 0 | 51 | MALE   | G3 | Stage I | T1a | M0 |
| TCGA-BP-5004 | 1126 | 0 | 53 | MALE   | G3 | Stage I | T1a | M0 |
| TCGA-BP-5184 | 1133 | 0 | 54 | MALE   | G3 | Stage I | T1a | M0 |
| TCGA-BP-4994 | 1308 | 0 | 54 | MALE   | G3 | Stage I | T1a | M0 |
| TCGA-BP-5185 | 1132 | 0 | 56 | MALE   | G3 | Stage I | T1a | M0 |
| TCGA-BP-5182 | 1165 | 0 | 56 | MALE   | G3 | Stage I | T1a | M0 |

|              |      |   |    |        |    |           |     |    |
|--------------|------|---|----|--------|----|-----------|-----|----|
| TCGA-BP-4993 | 177  | 0 | 58 | MALE   | G3 | Stage I   | T1a | M0 |
| TCGA-AK-3440 | 1745 | 0 | 58 | MALE   | G3 | Stage I   | T1a | M0 |
| TCGA-BP-5175 | 932  | 0 | 60 | MALE   | G3 | Stage I   | T1a | M0 |
| TCGA-BP-5190 | 1011 | 0 | 61 | MALE   | G3 | Stage I   | T1a | M0 |
| TCGA-B0-5083 | 1045 | 1 | 63 | MALE   | G3 | Stage I   | T1a | M0 |
| TCGA-CJ-6030 | 2299 | 1 | 65 | MALE   | G3 | Stage I   | T1a | M0 |
| TCGA-BP-4986 | 785  | 0 | 75 | MALE   | G3 | Stage I   | T1a | M0 |
| TCGA-BP-4976 | 1632 | 0 | 77 | MALE   | G3 | Stage I   | T1a | M0 |
| TCGA-B0-5077 | 1317 | 1 | 77 | MALE   | G3 | Stage I   | T1a | M0 |
| TCGA-BP-4781 | 2080 | 0 | 78 | MALE   | G3 | Stage I   | T1a | M0 |
| TCGA-B2-5641 | 324  | 0 | 79 | MALE   | G3 | Stage I   | T1a | M0 |
| TCGA-B2-4099 | 374  | 0 | 83 | MALE   | G3 | Stage I   | T1a | M0 |
| TCGA-CJ-5672 | 1972 | 1 | 84 | MALE   | G3 | Stage I   | T1a | M0 |
| TCGA-CJ-4889 | 1946 | 0 | 63 | FEMALE | G4 | Stage I   | T1a | M0 |
| TCGA-CJ-6027 | 1855 | 0 | 77 | MALE   | G4 | Stage I   | T1a | M0 |
| TCGA-BP-4970 | 433  | 0 | 44 | MALE   | G3 | Stage III | T1a | M0 |
| TCGA-A3-3320 | 1508 | 0 | 52 | FEMALE | G1 | Stage I   | T1b | M0 |
| TCGA-B0-5690 | 2408 | 0 | 53 | FEMALE | G1 | Stage I   | T1b | M0 |
| TCGA-BP-4165 | 3037 | 0 | 64 | FEMALE | G1 | Stage I   | T1b | M0 |
| TCGA-A3-3323 | 1106 | 0 | 53 | MALE   | G1 | Stage I   | T1b | M0 |
| TCGA-A3-3349 | 1385 | 0 | 34 | FEMALE | G2 | Stage I   | T1b | M0 |
| TCGA-B8-5546 | 505  | 0 | 38 | FEMALE | G2 | Stage I   | T1b | M0 |
| TCGA-B8-5552 | 392  | 0 | 41 | FEMALE | G2 | Stage I   | T1b | M0 |
| TCGA-B8-4146 | 511  | 0 | 41 | FEMALE | G2 | Stage I   | T1b | M0 |
| TCGA-BP-4987 | 1124 | 0 | 41 | FEMALE | G2 | Stage I   | T1b | M0 |
| TCGA-BP-5001 | 1177 | 0 | 43 | FEMALE | G2 | Stage I   | T1b | M0 |
| TCGA-B0-5693 | 3076 | 0 | 47 | FEMALE | G2 | Stage I   | T1b | M0 |
| TCGA-A3-3370 | 2274 | 0 | 48 | FEMALE | G2 | Stage I   | T1b | M0 |
| TCGA-A3-3374 | 1314 | 0 | 51 | FEMALE | G2 | Stage I   | T1b | M0 |
| TCGA-BP-4326 | 1625 | 1 | 53 | FEMALE | G2 | Stage I   | T1b | M0 |
| TCGA-BP-5181 | 1495 | 0 | 58 | FEMALE | G2 | Stage I   | T1b | M0 |
| TCGA-CJ-4634 | 1820 | 0 | 60 | FEMALE | G2 | Stage I   | T1b | M0 |
| TCGA-B0-5119 | 59   | 0 | 61 | FEMALE | G2 | Stage I   | T1b | M0 |
| TCGA-B4-5836 | 141  | 0 | 61 | FEMALE | G2 | Stage I   | T1b | M0 |
| TCGA-B0-5695 | 1420 | 0 | 61 | FEMALE | G2 | Stage I   | T1b | M0 |
| TCGA-CZ-4856 | 18   | 0 | 62 | FEMALE | G2 | Stage I   | T1b | M0 |
| TCGA-BP-4756 | 374  | 0 | 62 | FEMALE | G2 | Stage I   | T1b | M0 |
| TCGA-BP-4325 | 2964 | 0 | 64 | FEMALE | G2 | Stage I   | T1b | M0 |
| TCGA-CJ-4920 | 139  | 1 | 64 | FEMALE | G2 | Stage I   | T1b | M0 |
| TCGA-CJ-4892 | 1521 | 0 | 65 | FEMALE | G2 | Stage I   | T1b | M0 |
| TCGA-BP-4162 | 3074 | 0 | 65 | FEMALE | G2 | Stage I   | T1b | M0 |
| TCGA-B8-5553 | 435  | 0 | 67 | FEMALE | G2 | Stage I   | T1b | M0 |
| TCGA-BP-4340 | 562  | 1 | 70 | FEMALE | G2 | Stage I   | T1b | M0 |
| TCGA-B2-4098 | 51   | 1 | 72 | FEMALE | G2 | Stage I   | T1b | M0 |

|              |      |   |    |        |    |         |     |    |
|--------------|------|---|----|--------|----|---------|-----|----|
| TCGA-BP-4170 | 2343 | 1 | 72 | FEMALE | G2 | Stage I | T1b | M0 |
| TCGA-AK-3444 | 1471 | 0 | 80 | FEMALE | G2 | Stage I | T1b | M0 |
| TCGA-B0-4839 | 1639 | 1 | 80 | FEMALE | G2 | Stage I | T1b | M0 |
| TCGA-B0-4833 | 2386 | 1 | 82 | FEMALE | G2 | Stage I | T1b | M0 |
| TCGA-CZ-5988 | 693  | 0 | 38 | MALE   | G2 | Stage I | T1b | M0 |
| TCGA-B0-5117 | 535  | 0 | 40 | MALE   | G2 | Stage I | T1b | M0 |
| TCGA-CJ-4899 | 1528 | 0 | 42 | MALE   | G2 | Stage I | T1b | M0 |
| TCGA-B0-5399 | 652  | 0 | 46 | MALE   | G2 | Stage I | T1b | M0 |
| TCGA-CZ-4862 | 1843 | 0 | 46 | MALE   | G2 | Stage I | T1b | M0 |
| TCGA-EU-5906 | 206  | 0 | 55 | MALE   | G2 | Stage I | T1b | M0 |
| TCGA-B2-5633 | 358  | 0 | 56 | MALE   | G2 | Stage I | T1b | M0 |
| TCGA-B0-5121 | 554  | 0 | 56 | MALE   | G2 | Stage I | T1b | M0 |
| TCGA-B0-5710 | 1459 | 0 | 57 | MALE   | G2 | Stage I | T1b | M0 |
| TCGA-BP-4804 | 1459 | 0 | 59 | MALE   | G2 | Stage I | T1b | M0 |
| TCGA-CW-6088 | 3222 | 0 | 60 | MALE   | G2 | Stage I | T1b | M0 |
| TCGA-B2-4102 | 202  | 0 | 61 | MALE   | G2 | Stage I | T1b | M0 |
| TCGA-BP-4176 | 1955 | 0 | 64 | MALE   | G2 | Stage I | T1b | M0 |
| TCGA-CZ-4854 | 1404 | 1 | 68 | MALE   | G2 | Stage I | T1b | M0 |
| TCGA-BP-4158 | 3377 | 0 | 69 | MALE   | G2 | Stage I | T1b | M0 |
| TCGA-A3-3319 | 1130 | 0 | 70 | MALE   | G2 | Stage I | T1b | M0 |
| TCGA-BP-4159 | 2601 | 1 | 70 | MALE   | G2 | Stage I | T1b | M0 |
| TCGA-B0-5702 | 1605 | 0 | 71 | MALE   | G2 | Stage I | T1b | M0 |
| TCGA-AK-3434 | 2087 | 0 | 72 | MALE   | G2 | Stage I | T1b | M0 |
| TCGA-B2-3924 | 371  | 0 | 73 | MALE   | G2 | Stage I | T1b | M0 |
| TCGA-A3-3329 | 1624 | 0 | 75 | MALE   | G2 | Stage I | T1b | M0 |
| TCGA-A3-3328 | 1385 | 0 | 79 | MALE   | G2 | Stage I | T1b | M0 |
| TCGA-A3-3373 | 1621 | 0 | 54 | FEMALE | G3 | Stage I | T1b | M0 |
| TCGA-CJ-5686 | 2038 | 0 | 59 | FEMALE | G3 | Stage I | T1b | M0 |
| TCGA-B8-5551 | 15   | 0 | 65 | FEMALE | G3 | Stage I | T1b | M0 |
| TCGA-B0-4838 | 834  | 1 | 69 | FEMALE | G3 | Stage I | T1b | M0 |
| TCGA-CJ-4874 | 2283 | 0 | 73 | FEMALE | G3 | Stage I | T1b | M0 |
| TCGA-CJ-4893 | 750  | 0 | 76 | FEMALE | G3 | Stage I | T1b | M0 |
| TCGA-BP-5000 | 563  | 0 | 40 | MALE   | G3 | Stage I | T1b | M0 |
| TCGA-BP-4975 | 1433 | 0 | 40 | MALE   | G3 | Stage I | T1b | M0 |
| TCGA-BP-4968 | 1746 | 0 | 40 | MALE   | G3 | Stage I | T1b | M0 |
| TCGA-BP-4982 | 1014 | 0 | 42 | MALE   | G3 | Stage I | T1b | M0 |
| TCGA-BP-4338 | 2859 | 0 | 43 | MALE   | G3 | Stage I | T1b | M0 |
| TCGA-CW-5581 | 2799 | 0 | 44 | MALE   | G3 | Stage I | T1b | M0 |
| TCGA-AK-3458 | 1168 | 0 | 48 | MALE   | G3 | Stage I | T1b | M0 |
| TCGA-CJ-4635 | 1416 | 0 | 48 | MALE   | G3 | Stage I | T1b | M0 |
| TCGA-BP-4959 | 2660 | 0 | 49 | MALE   | G3 | Stage I | T1b | M0 |
| TCGA-CJ-4903 | 1560 | 0 | 50 | MALE   | G3 | Stage I | T1b | M0 |
| TCGA-A3-3324 | 1186 | 0 | 51 | MALE   | G3 | Stage I | T1b | M0 |
| TCGA-CZ-5984 | 1491 | 0 | 51 | MALE   | G3 | Stage I | T1b | M0 |

|              |      |   |    |        |    |           |     |    |
|--------------|------|---|----|--------|----|-----------|-----|----|
| TCGA-BP-5009 | 1092 | 1 | 52 | MALE   | G3 | Stage I   | T1b | M0 |
| TCGA-B8-5549 | 194  | 0 | 53 | MALE   | G3 | Stage I   | T1b | M0 |
| TCGA-B0-5812 | 2963 | 0 | 53 | MALE   | G3 | Stage I   | T1b | M0 |
| TCGA-B0-5088 | 563  | 1 | 53 | MALE   | G3 | Stage I   | T1b | M0 |
| TCGA-CJ-6031 | 1906 | 0 | 54 | MALE   | G3 | Stage I   | T1b | M0 |
| TCGA-BP-4977 | 454  | 0 | 57 | MALE   | G3 | Stage I   | T1b | M0 |
| TCGA-A3-3313 | 735  | 1 | 59 | MALE   | G3 | Stage I   | T1b | M0 |
| TCGA-B8-4621 | 431  | 0 | 63 | MALE   | G3 | Stage I   | T1b | M0 |
| TCGA-BP-4963 | 1834 | 0 | 63 | MALE   | G3 | Stage I   | T1b | M0 |
| TCGA-B0-4837 | 1378 | 1 | 63 | MALE   | G3 | Stage I   | T1b | M0 |
| TCGA-A3-3306 | 1120 | 0 | 67 | MALE   | G3 | Stage I   | T1b | M0 |
| TCGA-BP-4995 | 1371 | 0 | 68 | MALE   | G3 | Stage I   | T1b | M0 |
| TCGA-CW-6090 | 2552 | 0 | 68 | MALE   | G3 | Stage I   | T1b | M0 |
| TCGA-A3-3346 | 137  | 1 | 68 | MALE   | G3 | Stage I   | T1b | M0 |
| TCGA-A3-3382 | 574  | 0 | 69 | MALE   | G3 | Stage I   | T1b | M0 |
| TCGA-A3-3367 | 2270 | 0 | 72 | MALE   | G3 | Stage I   | T1b | M0 |
| TCGA-B0-5703 | 1203 | 0 | 73 | MALE   | G3 | Stage I   | T1b | M0 |
| TCGA-BP-4161 | 2746 | 0 | 74 | MALE   | G3 | Stage I   | T1b | M0 |
| TCGA-B0-5698 | 2583 | 0 | 77 | MALE   | G3 | Stage I   | T1b | M0 |
| TCGA-CJ-5683 | 1889 | 0 | 78 | MALE   | G3 | Stage I   | T1b | M0 |
| TCGA-AK-3454 | 874  | 0 | 84 | MALE   | G3 | Stage I   | T1b | M0 |
| TCGA-CJ-4872 | 1435 | 0 | 51 | MALE   | G4 | Stage I   | T1b | M0 |
| TCGA-BP-5189 | 822  | 1 | 60 | MALE   | G4 | Stage I   | T1b | M0 |
| TCGA-BP-4992 | 501  | 0 | 66 | MALE   | G4 | Stage I   | T1b | M0 |
| TCGA-BP-5169 | 193  | 0 | 70 | MALE   | G4 | Stage I   | T1b | M0 |
| TCGA-CJ-5689 | 0    | 1 | 90 | MALE   | G4 | Stage I   | T1b | M0 |
| TCGA-A3-3347 | 1610 | 1 | 76 | FEMALE | G2 | Stage III | T1b | M0 |
| TCGA-B4-5844 | 7    | 0 | 61 | FEMALE | G1 | Stage II  | T2  | M0 |
| TCGA-CJ-4639 | 2308 | 0 | 49 | FEMALE | G2 | Stage II  | T2  | M0 |
| TCGA-AK-3429 | 2017 | 0 | 54 | FEMALE | G2 | Stage II  | T2  | M0 |
| TCGA-AK-3453 | 1397 | 0 | 58 | FEMALE | G2 | Stage II  | T2  | M0 |
| TCGA-BP-4327 | 109  | 1 | 75 | FEMALE | G2 | Stage II  | T2  | M0 |
| TCGA-BP-4169 | 701  | 1 | 76 | FEMALE | G2 | Stage II  | T2  | M0 |
| TCGA-B0-4852 | 1121 | 1 | 78 | FEMALE | G2 | Stage II  | T2  | M0 |
| TCGA-CZ-5469 | 946  | 1 | 41 | MALE   | G2 | Stage II  | T2  | M0 |
| TCGA-BP-5007 | 1140 | 0 | 45 | MALE   | G2 | Stage II  | T2  | M0 |
| TCGA-B0-5706 | 2414 | 0 | 45 | MALE   | G2 | Stage II  | T2  | M0 |
| TCGA-CJ-4642 | 1628 | 0 | 47 | MALE   | G2 | Stage II  | T2  | M0 |
| TCGA-A3-3363 | 319  | 0 | 50 | MALE   | G2 | Stage II  | T2  | M0 |
| TCGA-CZ-5985 | 1629 | 0 | 58 | MALE   | G2 | Stage II  | T2  | M0 |
| TCGA-BP-4962 | 1785 | 0 | 58 | MALE   | G2 | Stage II  | T2  | M0 |
| TCGA-B2-3923 | 362  | 0 | 59 | MALE   | G2 | Stage II  | T2  | M0 |
| TCGA-CZ-5989 | 1599 | 0 | 60 | MALE   | G2 | Stage II  | T2  | M0 |
| TCGA-CZ-4861 | 446  | 1 | 63 | MALE   | G2 | Stage II  | T2  | M0 |

|              |      |   |    |        |    |           |     |    |
|--------------|------|---|----|--------|----|-----------|-----|----|
| TCGA-CZ-5453 | 25   | 0 | 67 | MALE   | G2 | Stage II  | T2  | M0 |
| TCGA-A3-3317 | 1491 | 0 | 67 | MALE   | G2 | Stage II  | T2  | M0 |
| TCGA-CZ-5452 | 1556 | 0 | 69 | MALE   | G2 | Stage II  | T2  | M0 |
| TCGA-CZ-5463 | 662  | 0 | 76 | MALE   | G2 | Stage II  | T2  | M0 |
| TCGA-AK-3447 | 1217 | 0 | 83 | MALE   | G2 | Stage II  | T2  | M0 |
| TCGA-AK-3431 | 1853 | 0 | 62 | FEMALE | G3 | Stage II  | T2  | M0 |
| TCGA-CJ-6032 | 2548 | 0 | 63 | FEMALE | G3 | Stage II  | T2  | M0 |
| TCGA-B0-4818 | 510  | 1 | 68 | FEMALE | G3 | Stage II  | T2  | M0 |
| TCGA-CZ-5470 | 0    | 0 | 72 | FEMALE | G3 | Stage II  | T2  | M0 |
| TCGA-BP-4960 | 2172 | 0 | 46 | MALE   | G3 | Stage II  | T2  | M0 |
| TCGA-BP-4173 | 1893 | 0 | 47 | MALE   | G3 | Stage II  | T2  | M0 |
| TCGA-AK-3456 | 1143 | 0 | 48 | MALE   | G3 | Stage II  | T2  | M0 |
| TCGA-AK-3451 | 1481 | 0 | 48 | MALE   | G3 | Stage II  | T2  | M0 |
| TCGA-BP-4174 | 1879 | 0 | 49 | MALE   | G3 | Stage II  | T2  | M0 |
| TCGA-B0-4816 | 1371 | 1 | 49 | MALE   | G3 | Stage II  | T2  | M0 |
| TCGA-A3-3316 | 1493 | 0 | 57 | MALE   | G3 | Stage II  | T2  | M0 |
| TCGA-CZ-5456 | 1558 | 0 | 57 | MALE   | G3 | Stage II  | T2  | M0 |
| TCGA-CJ-4912 | 1657 | 0 | 61 | MALE   | G3 | Stage II  | T2  | M0 |
| TCGA-A3-3357 | 2688 | 0 | 62 | MALE   | G3 | Stage II  | T2  | M0 |
| TCGA-CZ-5451 | 1668 | 0 | 74 | MALE   | G3 | Stage II  | T2  | M0 |
| TCGA-A3-3343 | 945  | 0 | 79 | MALE   | G3 | Stage II  | T2  | M0 |
| TCGA-BP-4342 | 2256 | 1 | 79 | MALE   | G3 | Stage II  | T2  | M0 |
| TCGA-CZ-4864 | 1315 | 1 | 86 | MALE   | G3 | Stage II  | T2  | M0 |
| TCGA-CZ-4858 | 1943 | 0 | 39 | MALE   | G4 | Stage II  | T2  | M0 |
| TCGA-BP-5200 | 1063 | 0 | 44 | MALE   | G4 | Stage II  | T2  | M0 |
| TCGA-BP-5199 | 1355 | 0 | 58 | MALE   | G4 | Stage II  | T2  | M0 |
| TCGA-B0-4822 | 1111 | 1 | 78 | MALE   | G4 | Stage II  | T2  | M0 |
| TCGA-CJ-4869 | 2554 | 0 | 49 | MALE   | G2 | Stage III | T2  | M0 |
| TCGA-A3-3351 | 910  | 0 | 42 | MALE   | G2 | Stage II  | T2a | M0 |
| TCGA-B8-5162 | 22   | 0 | 62 | MALE   | G2 | Stage II  | T2a | M0 |
| TCGA-B2-4101 | 188  | 0 | 52 | MALE   | G3 | Stage II  | T2a | M0 |
| TCGA-CJ-5675 | 2430 | 0 | 70 | MALE   | G3 | Stage II  | T2a | M0 |
| TCGA-A3-3335 | 1886 | 0 | 41 | MALE   | G4 | Stage II  | T2a | M0 |
| TCGA-CJ-4643 | 1793 | 0 | 67 | FEMALE | G3 | Stage II  | T2b | M0 |
| TCGA-CJ-4876 | 1955 | 0 | 57 | MALE   | G3 | Stage II  | T2b | M0 |
| TCGA-A3-3372 | 735  | 0 | 64 | MALE   | G2 | Stage III | T3  | M0 |
| TCGA-B8-4151 | 280  | 0 | 51 | FEMALE | G2 | Stage III | T3a | M0 |
| TCGA-BP-4351 | 970  | 0 | 51 | FEMALE | G2 | Stage III | T3a | M0 |
| TCGA-BP-4164 | 992  | 1 | 51 | FEMALE | G2 | Stage III | T3a | M0 |
| TCGA-CJ-4870 | 1498 | 0 | 58 | FEMALE | G2 | Stage III | T3a | M0 |
| TCGA-BP-4330 | 1888 | 0 | 60 | FEMALE | G2 | Stage III | T3a | M0 |
| TCGA-B0-5113 | 359  | 0 | 69 | FEMALE | G2 | Stage III | T3a | M0 |
| TCGA-B8-4620 | 226  | 0 | 70 | FEMALE | G2 | Stage III | T3a | M0 |
| TCGA-CJ-4878 | 2186 | 0 | 71 | FEMALE | G2 | Stage III | T3a | M0 |

|              |      |   |    |        |    |           |     |    |
|--------------|------|---|----|--------|----|-----------|-----|----|
| TCGA-B0-5075 | 637  | 1 | 77 | FEMALE | G2 | Stage III | T3a | M0 |
| TCGA-BP-4332 | 1133 | 0 | 36 | MALE   | G2 | Stage III | T3a | M0 |
| TCGA-B0-5108 | 911  | 0 | 54 | MALE   | G2 | Stage III | T3a | M0 |
| TCGA-B0-4718 | 616  | 0 | 57 | MALE   | G2 | Stage III | T3a | M0 |
| TCGA-BP-4167 | 2718 | 0 | 59 | MALE   | G2 | Stage III | T3a | M0 |
| TCGA-CJ-5684 | 2231 | 0 | 61 | MALE   | G2 | Stage III | T3a | M0 |
| TCGA-CZ-5466 | 685  | 0 | 67 | MALE   | G2 | Stage III | T3a | M0 |
| TCGA-BP-4160 | 2881 | 0 | 67 | MALE   | G2 | Stage III | T3a | M0 |
| TCGA-BP-4341 | 1589 | 1 | 67 | MALE   | G2 | Stage III | T3a | M0 |
| TCGA-BP-5202 | 29   | 0 | 75 | MALE   | G2 | Stage III | T3a | M0 |
| TCGA-BP-4329 | 845  | 1 | 75 | MALE   | G2 | Stage III | T3a | M0 |
| TCGA-BP-4967 | 205  | 0 | 76 | MALE   | G2 | Stage III | T3a | M0 |
| TCGA-BP-5191 | 967  | 0 | 79 | MALE   | G2 | Stage III | T3a | M0 |
| TCGA-BP-4972 | 1502 | 0 | 43 | FEMALE | G3 | Stage III | T3a | M0 |
| TCGA-BP-4163 | 2839 | 0 | 60 | FEMALE | G3 | Stage III | T3a | M0 |
| TCGA-B0-5709 | 3117 | 0 | 62 | FEMALE | G3 | Stage III | T3a | M0 |
| TCGA-B8-5163 | 4    | 0 | 63 | FEMALE | G3 | Stage III | T3a | M0 |
| TCGA-CJ-4916 | 1373 | 0 | 69 | FEMALE | G3 | Stage III | T3a | M0 |
| TCGA-CJ-4884 | 1759 | 0 | 72 | FEMALE | G3 | Stage III | T3a | M0 |
| TCGA-B0-4710 | 96   | 0 | 75 | FEMALE | G3 | Stage III | T3a | M0 |
| TCGA-BP-4981 | 1097 | 1 | 75 | FEMALE | G3 | Stage III | T3a | M0 |
| TCGA-B0-5085 | 770  | 1 | 76 | FEMALE | G3 | Stage III | T3a | M0 |
| TCGA-CJ-4897 | 1808 | 0 | 79 | FEMALE | G3 | Stage III | T3a | M0 |
| TCGA-CJ-4873 | 1776 | 0 | 85 | FEMALE | G3 | Stage III | T3a | M0 |
| TCGA-AK-3426 | 885  | 1 | 37 | MALE   | G3 | Stage III | T3a | M0 |
| TCGA-BP-4971 | 1487 | 0 | 40 | MALE   | G3 | Stage III | T3a | M0 |
| TCGA-CJ-4881 | 2014 | 0 | 41 | MALE   | G3 | Stage III | T3a | M0 |
| TCGA-CZ-5458 | 1558 | 0 | 43 | MALE   | G3 | Stage III | T3a | M0 |
| TCGA-BP-4973 | 1384 | 0 | 47 | MALE   | G3 | Stage III | T3a | M0 |
| TCGA-B0-4810 | 478  | 1 | 47 | MALE   | G3 | Stage III | T3a | M0 |
| TCGA-B0-4811 | 1417 | 1 | 48 | MALE   | G3 | Stage III | T3a | M0 |
| TCGA-CJ-4636 | 1924 | 0 | 51 | MALE   | G3 | Stage III | T3a | M0 |
| TCGA-B0-4849 | 69   | 1 | 51 | MALE   | G3 | Stage III | T3a | M0 |
| TCGA-BP-4334 | 645  | 1 | 56 | MALE   | G3 | Stage III | T3a | M0 |
| TCGA-BP-5183 | 1291 | 0 | 57 | MALE   | G3 | Stage III | T3a | M0 |
| TCGA-CJ-4882 | 1883 | 0 | 57 | MALE   | G3 | Stage III | T3a | M0 |
| TCGA-B0-4843 | 320  | 1 | 57 | MALE   | G3 | Stage III | T3a | M0 |
| TCGA-BP-4989 | 118  | 0 | 58 | MALE   | G3 | Stage III | T3a | M0 |
| TCGA-CJ-4894 | 841  | 1 | 58 | MALE   | G3 | Stage III | T3a | M0 |
| TCGA-B0-4696 | 866  | 1 | 58 | MALE   | G3 | Stage III | T3a | M0 |
| TCGA-CJ-4902 | 1520 | 0 | 61 | MALE   | G3 | Stage III | T3a | M0 |
| TCGA-BP-4343 | 1912 | 1 | 64 | MALE   | G3 | Stage III | T3a | M0 |
| TCGA-B8-5164 | 23   | 0 | 65 | MALE   | G3 | Stage III | T3a | M0 |
| TCGA-BP-4166 | 13   | 0 | 69 | MALE   | G3 | Stage III | T3a | M0 |



|              |      |   |    |        |    |           |     |    |
|--------------|------|---|----|--------|----|-----------|-----|----|
| TCGA-AK-3445 | 1280 | 0 | 69 | MALE   | G3 | Stage III | T3a | M0 |
| TCGA-B8-5550 | 434  | 0 | 71 | MALE   | G3 | Stage III | T3a | M0 |
| TCGA-B0-5694 | 480  | 1 | 71 | MALE   | G3 | Stage III | T3a | M0 |
| TCGA-B0-5100 | 1913 | 1 | 72 | MALE   | G3 | Stage III | T3a | M0 |
| TCGA-B8-4153 | 405  | 0 | 74 | MALE   | G3 | Stage III | T3a | M0 |
| TCGA-A3-3352 | 561  | 1 | 74 | MALE   | G3 | Stage III | T3a | M0 |
| TCGA-BP-4803 | 204  | 0 | 79 | MALE   | G3 | Stage III | T3a | M0 |
| TCGA-EU-5907 | 127  | 0 | 81 | MALE   | G3 | Stage III | T3a | M0 |
| TCGA-B0-5095 | 245  | 1 | 81 | MALE   | G3 | Stage III | T3a | M0 |
| TCGA-CJ-4913 | 1173 | 1 | 45 | FEMALE | G4 | Stage III | T3a | M0 |
| TCGA-BP-4355 | 953  | 1 | 59 | FEMALE | G4 | Stage III | T3a | M0 |
| TCGA-BP-4983 | 1413 | 0 | 67 | FEMALE | G4 | Stage III | T3a | M0 |
| TCGA-B0-4693 | 77   | 1 | 72 | FEMALE | G4 | Stage III | T3a | M0 |
| TCGA-B0-4842 | 1724 | 1 | 73 | FEMALE | G4 | Stage III | T3a | M0 |
| TCGA-CZ-5467 | 73   | 1 | 86 | FEMALE | G4 | Stage III | T3a | M0 |
| TCGA-CW-6097 | 571  | 1 | 32 | MALE   | G4 | Stage III | T3a | M0 |
| TCGA-CJ-4640 | 1998 | 0 | 49 | MALE   | G4 | Stage III | T3a | M0 |
| TCGA-B8-5158 | 293  | 0 | 56 | MALE   | G4 | Stage III | T3a | M0 |
| TCGA-BP-4761 | 182  | 0 | 57 | MALE   | G4 | Stage III | T3a | M0 |
| TCGA-B0-4706 | 65   | 1 | 61 | MALE   | G4 | Stage III | T3a | M0 |
| TCGA-CZ-5457 | 1547 | 0 | 62 | MALE   | G4 | Stage III | T3a | M0 |
| TCGA-B0-4707 | 600  | 1 | 63 | MALE   | G4 | Stage III | T3a | M0 |
| TCGA-BP-5010 | 878  | 1 | 63 | MALE   | G4 | Stage III | T3a | M0 |
| TCGA-B0-4815 | 1588 | 1 | 65 | MALE   | G4 | Stage III | T3a | M0 |
| TCGA-B0-5696 | 1727 | 0 | 69 | MALE   | G4 | Stage III | T3a | M0 |
| TCGA-BP-4985 | 952  | 1 | 72 | MALE   | G4 | Stage III | T3a | M0 |
| TCGA-B0-5097 | 665  | 0 | 59 | FEMALE | G2 | Stage III | T3b | M0 |
| TCGA-CW-5587 | 2226 | 0 | 62 | FEMALE | G2 | Stage III | T3b | M0 |
| TCGA-CZ-5465 | 1377 | 0 | 76 | FEMALE | G2 | Stage III | T3b | M0 |
| TCGA-B0-4713 | 202  | 1 | 76 | FEMALE | G2 | Stage III | T3b | M0 |
| TCGA-A3-3308 | 16   | 0 | 77 | FEMALE | G2 | Stage III | T3b | M0 |
| TCGA-B0-5081 | 362  | 1 | 79 | FEMALE | G2 | Stage III | T3b | M0 |
| TCGA-AK-3428 | 2223 | 0 | 62 | MALE   | G2 | Stage III | T3b | M0 |
| TCGA-B4-5832 | 155  | 0 | 65 | MALE   | G2 | Stage III | T3b | M0 |
| TCGA-BP-4347 | 1367 | 0 | 74 | MALE   | G2 | Stage III | T3b | M0 |
| TCGA-CZ-4863 | 1691 | 0 | 51 | FEMALE | G3 | Stage III | T3b | M0 |
| TCGA-B0-5692 | 1487 | 0 | 66 | FEMALE | G3 | Stage III | T3b | M0 |
| TCGA-B0-4821 | 1230 | 1 | 68 | FEMALE | G3 | Stage III | T3b | M0 |
| TCGA-AK-3455 | 683  | 1 | 71 | FEMALE | G3 | Stage III | T3b | M0 |
| TCGA-B0-5713 | 1865 | 0 | 75 | FEMALE | G3 | Stage III | T3b | M0 |
| TCGA-B0-5099 | 485  | 1 | 88 | FEMALE | G3 | Stage III | T3b | M0 |
| TCGA-BP-4797 | 1107 | 0 | 34 | MALE   | G3 | Stage III | T3b | M0 |
| TCGA-CJ-4901 | 1450 | 0 | 47 | MALE   | G3 | Stage III | T3b | M0 |
| TCGA-CJ-5676 | 2575 | 0 | 47 | MALE   | G3 | Stage III | T3b | M0 |

|              |      |   |    |        |    |           |     |    |
|--------------|------|---|----|--------|----|-----------|-----|----|
| TCGA-B0-5711 | 2931 | 0 | 50 | MALE   | G3 | Stage III | T3b | M0 |
| TCGA-B0-5116 | 657  | 0 | 52 | MALE   | G3 | Stage III | T3b | M0 |
| TCGA-B0-4848 | 883  | 1 | 54 | MALE   | G3 | Stage III | T3b | M0 |
| TCGA-BP-4346 | 1493 | 1 | 57 | MALE   | G3 | Stage III | T3b | M0 |
| TCGA-CJ-4907 | 1499 | 0 | 58 | MALE   | G3 | Stage III | T3b | M0 |
| TCGA-AK-3430 | 480  | 1 | 61 | MALE   | G3 | Stage III | T3b | M0 |
| TCGA-BP-4345 | 1516 | 0 | 62 | MALE   | G3 | Stage III | T3b | M0 |
| TCGA-CZ-5459 | 1515 | 0 | 63 | MALE   | G3 | Stage III | T3b | M0 |
| TCGA-A3-3307 | 1436 | 0 | 66 | MALE   | G3 | Stage III | T3b | M0 |
| TCGA-B0-4813 | 18   | 1 | 68 | MALE   | G3 | Stage III | T3b | M0 |
| TCGA-BP-4799 | 1133 | 1 | 70 | MALE   | G3 | Stage III | T3b | M0 |
| TCGA-BP-5198 | 603  | 0 | 72 | MALE   | G3 | Stage III | T3b | M0 |
| TCGA-CW-5584 | 164  | 1 | 74 | MALE   | G3 | Stage III | T3b | M0 |
| TCGA-B0-5400 | 1132 | 0 | 59 | FEMALE | G4 | Stage III | T3b | M0 |
| TCGA-BP-4337 | 2    | 1 | 76 | FEMALE | G4 | Stage III | T3b | M0 |
| TCGA-B0-4827 | 885  | 1 | 77 | FEMALE | G4 | Stage III | T3b | M0 |
| TCGA-B0-5701 | 1732 | 0 | 65 | MALE   | G4 | Stage III | T3b | M0 |
| TCGA-B0-5109 | 587  | 1 | 69 | MALE   | G4 | Stage III | T3b | M0 |
| TCGA-B0-4694 | 106  | 1 | 72 | MALE   | G4 | Stage III | T3b | M0 |
| TCGA-CJ-5679 | 679  | 1 | 73 | MALE   | G4 | Stage III | T3b | M0 |
| TCGA-B0-4817 | 1019 | 1 | 81 | MALE   | G3 | Stage III | T3c | M0 |
| TCGA-CJ-4891 | 819  | 1 | 57 | FEMALE | G4 | Stage III | T3c | M0 |
| TCGA-BP-4770 | 329  | 1 | 73 | FEMALE | G4 | Stage IV  | T4  | M0 |
| TCGA-B0-5402 | 449  | 0 | 64 | MALE   | G4 | Stage IV  | T4  | M0 |
| TCGA-B0-4698 | 42   | 1 | 75 | MALE   | G4 | Stage IV  | T4  | M0 |
| TCGA-B0-5092 | 459  | 1 | 53 | FEMALE | G3 | Stage IV  | T1a | M1 |
| TCGA-CZ-5462 | 311  | 1 | 83 | MALE   | G3 | Stage IV  | T1b | M1 |
| TCGA-G6-A5PC | 242  | 1 | 54 | FEMALE | G4 | Stage IV  | T1b | M1 |
| TCGA-CZ-5461 | 330  | 1 | 52 | MALE   | G4 | Stage IV  | T1b | M1 |
| TCGA-AK-3436 | 2044 | 0 | 40 | MALE   | G2 | Stage IV  | T2  | M1 |
| TCGA-CZ-5454 | 722  | 1 | 63 | MALE   | G2 | Stage IV  | T2  | M1 |
| TCGA-B0-5712 | 2722 | 0 | 68 | FEMALE | G3 | Stage IV  | T2  | M1 |
| TCGA-B0-5115 | 797  | 0 | 43 | MALE   | G3 | Stage IV  | T2  | M1 |
| TCGA-B0-4691 | 139  | 1 | 55 | MALE   | G3 | Stage IV  | T2  | M1 |
| TCGA-B0-4841 | 204  | 1 | 63 | MALE   | G3 | Stage IV  | T2  | M1 |
| TCGA-B0-4828 | 307  | 1 | 79 | MALE   | G3 | Stage IV  | T2  | M1 |
| TCGA-B0-5107 | 927  | 1 | 65 | FEMALE | G4 | Stage IV  | T2  | M1 |
| TCGA-CJ-5678 | 574  | 1 | 62 | MALE   | G3 | Stage IV  | T2b | M1 |
| TCGA-CJ-4637 | 2227 | 1 | 52 | FEMALE | G4 | Stage IV  | T2b | M1 |
| TCGA-B4-5377 | 365  | 0 | 68 | FEMALE | G3 | Stage IV  | T3  | M1 |
| TCGA-B2-5639 | 417  | 0 | 46 | MALE   | G3 | Stage IV  | T3  | M1 |
| TCGA-B0-4846 | 1200 | 1 | 52 | MALE   | G2 | Stage IV  | T3a | M1 |
| TCGA-CW-5591 | 2271 | 0 | 56 | MALE   | G2 | Stage IV  | T3a | M1 |
| TCGA-B0-4845 | 1986 | 1 | 70 | MALE   | G2 | Stage IV  | T3a | M1 |

|              |      |   |    |        |    |          |     |    |
|--------------|------|---|----|--------|----|----------|-----|----|
| TCGA-CJ-5681 | 552  | 1 | 44 | FEMALE | G3 | Stage IV | T3a | M1 |
| TCGA-CJ-4644 | 336  | 1 | 48 | FEMALE | G3 | Stage IV | T3a | M1 |
| TCGA-CJ-4904 | 1792 | 0 | 60 | FEMALE | G3 | Stage IV | T3a | M1 |
| TCGA-BP-4335 | 475  | 1 | 65 | FEMALE | G3 | Stage IV | T3a | M1 |
| TCGA-B0-4701 | 238  | 1 | 66 | FEMALE | G3 | Stage IV | T3a | M1 |
| TCGA-B8-4143 | 709  | 1 | 66 | FEMALE | G3 | Stage IV | T3a | M1 |
| TCGA-CW-5580 | 1964 | 1 | 73 | FEMALE | G3 | Stage IV | T3a | M1 |
| TCGA-B0-5084 | 222  | 1 | 33 | MALE   | G3 | Stage IV | T3a | M1 |
| TCGA-CJ-4868 | 646  | 1 | 42 | MALE   | G3 | Stage IV | T3a | M1 |
| TCGA-CJ-4887 | 932  | 1 | 48 | MALE   | G3 | Stage IV | T3a | M1 |
| TCGA-CW-5590 | 1075 | 1 | 51 | MALE   | G3 | Stage IV | T3a | M1 |
| TCGA-CZ-4857 | 1432 | 1 | 56 | MALE   | G3 | Stage IV | T3a | M1 |
| TCGA-B8-4622 | 181  | 0 | 57 | MALE   | G3 | Stage IV | T3a | M1 |
| TCGA-B0-4844 | 313  | 1 | 60 | MALE   | G3 | Stage IV | T3a | M1 |
| TCGA-B0-4847 | 793  | 1 | 60 | MALE   | G3 | Stage IV | T3a | M1 |
| TCGA-B0-5080 | 342  | 1 | 63 | MALE   | G3 | Stage IV | T3a | M1 |
| TCGA-CJ-4885 | 2125 | 0 | 64 | MALE   | G3 | Stage IV | T3a | M1 |
| TCGA-CJ-4875 | 2353 | 0 | 67 | MALE   | G3 | Stage IV | T3a | M1 |
| TCGA-B0-4712 | 1337 | 1 | 76 | MALE   | G3 | Stage IV | T3a | M1 |
| TCGA-CJ-4638 | 431  | 1 | 46 | FEMALE | G4 | Stage IV | T3a | M1 |
| TCGA-CJ-6033 | 224  | 1 | 54 | FEMALE | G4 | Stage IV | T3a | M1 |
| TCGA-CJ-5677 | 782  | 1 | 54 | FEMALE | G4 | Stage IV | T3a | M1 |
| TCGA-CJ-4641 | 1661 | 1 | 55 | FEMALE | G4 | Stage IV | T3a | M1 |
| TCGA-BP-4787 | 480  | 1 | 59 | FEMALE | G4 | Stage IV | T3a | M1 |
| TCGA-CJ-4923 | 572  | 1 | 63 | FEMALE | G4 | Stage IV | T3a | M1 |
| TCGA-CJ-5680 | 768  | 1 | 65 | FEMALE | G4 | Stage IV | T3a | M1 |
| TCGA-B0-4703 | 182  | 1 | 51 | MALE   | G4 | Stage IV | T3a | M1 |
| TCGA-BP-4974 | 211  | 1 | 58 | MALE   | G4 | Stage IV | T3a | M1 |
| TCGA-CJ-6028 | 1625 | 1 | 58 | MALE   | G4 | Stage IV | T3a | M1 |
| TCGA-CJ-4888 | 1567 | 1 | 59 | MALE   | G4 | Stage IV | T3a | M1 |
| TCGA-CJ-5682 | 1883 | 0 | 60 | MALE   | G4 | Stage IV | T3a | M1 |
| TCGA-CW-6087 | 41   | 1 | 61 | MALE   | G4 | Stage IV | T3a | M1 |
| TCGA-BP-4771 | 162  | 1 | 62 | MALE   | G4 | Stage IV | T3a | M1 |
| TCGA-CJ-4895 | 1200 | 1 | 62 | MALE   | G4 | Stage IV | T3a | M1 |
| TCGA-CJ-4871 | 2423 | 0 | 63 | MALE   | G4 | Stage IV | T3a | M1 |
| TCGA-CJ-4918 | 93   | 1 | 64 | MALE   | G4 | Stage IV | T3a | M1 |
| TCGA-BP-5178 | 1912 | 1 | 71 | MALE   | G4 | Stage IV | T3a | M1 |
| TCGA-CJ-4890 | 2085 | 0 | 72 | MALE   | G4 | Stage IV | T3a | M1 |
| TCGA-CW-5585 | 2609 | 0 | 51 | MALE   | G2 | Stage IV | T3b | M1 |
| TCGA-CZ-5460 | 1430 | 0 | 55 | MALE   | G2 | Stage IV | T3b | M1 |
| TCGA-CZ-5987 | 445  | 1 | 60 | MALE   | G2 | Stage IV | T3b | M1 |
| TCGA-B0-5094 | 333  | 1 | 62 | MALE   | G2 | Stage IV | T3b | M1 |
| TCGA-CZ-5464 | 1492 | 0 | 69 | MALE   | G2 | Stage IV | T3b | M1 |
| TCGA-B0-4836 | 1238 | 1 | 61 | MALE   | G3 | Stage IV | T3b | M1 |

|              |      |   |    |        |    |          |     |    |
|--------------|------|---|----|--------|----|----------|-----|----|
| TCGA-B0-4714 | 99   | 1 | 81 | MALE   | G3 | Stage IV | T3b | M1 |
| TCGA-B0-4697 | 578  | 1 | 46 | FEMALE | G4 | Stage IV | T3b | M1 |
| TCGA-B0-4819 | 183  | 1 | 60 | FEMALE | G4 | Stage IV | T3b | M1 |
| TCGA-BP-4352 | 344  | 1 | 74 | FEMALE | G4 | Stage IV | T3b | M1 |
| TCGA-BP-5201 | 951  | 0 | 63 | MALE   | G4 | Stage IV | T3b | M1 |
| TCGA-CZ-5455 | 561  | 1 | 63 | MALE   | G4 | Stage IV | T3b | M1 |
| TCGA-CZ-5468 | 59   | 1 | 84 | MALE   | G4 | Stage IV | T3b | M1 |
| TCGA-B0-4814 | 168  | 1 | 58 | MALE   | G3 | Stage IV | T4  | M1 |
| TCGA-B0-4690 | 43   | 1 | 65 | MALE   | G3 | Stage IV | T4  | M1 |
| TCGA-CJ-4900 | 1714 | 1 | 69 | FEMALE | G4 | Stage IV | T4  | M1 |
| TCGA-BP-4354 | 1034 | 1 | 40 | MALE   | G4 | Stage IV | T4  | M1 |
| TCGA-B0-4688 | 101  | 1 | 46 | MALE   | G4 | Stage IV | T4  | M1 |
| TCGA-CZ-4860 | 206  | 1 | 60 | MALE   | G4 | Stage IV | T4  | M1 |
| TCGA-B0-4700 | 1980 | 1 | 60 | MALE   | G4 | Stage IV | T4  | M1 |
| TCGA-B0-4699 | 110  | 1 | 74 | MALE   | G4 | Stage IV | T4  | M1 |
| TCGA-T7-A92I | 356  | 0 | 47 | FEMALE | G1 | Stage I  | T1a | MX |
