# Supplementary material for: Effects and Prognostic Values of Circadian Genes CSNK1E/GNA11/KLF9/THRAP3 in Kidney Renal Clear Cell Carcinoma via a Comprehensive Analysis
Source: Bioengineering (Basel). 2022 Jul 11;9(7):306. doi: 10.3390/bioengineering9070306 (PMC9311602; doi:10.3390/bioengineering9070306)
Supplement: Supplementary file 1 [file bioengineering-09-00306-s001.zip]

Archive with 15 entries (15 files):
- Supplementary Figure.S1.tif
- Supplementary Figure.S10.tif
- Supplementary Figure.S2.tif
- Supplementary Figure.S3.tif
- Supplementary Figure.S4.tif
- Supplementary Figure.S5.tif
- Supplementary Figure.S6.tif
- Supplementary Figure.S7.tif
- Supplementary Figure.S8.tif
- Supplementary Figure.S9.tif
- Supplementary Table.S1.pdf
- Supplementary Table.S2.pdf
- Supplementary Table.S3.pdf
- Supplementary Table.S4.pdf
- Supplementary Table.S5.pdf
